# Supplementary material
Source: PubMed Central journal article supplement (PMC5001588)
Supplement: supp_gkw358_nar-03733-y-2015-File009.pdf [file supp_gkw358_nar-03733-y-2015-File009.pdf]

**SUPPLEMENTAL MATERIAL: Lee and Gottesman****SUPPLEMENTARY FIGURES**

**Fig. S1: Regulation of *lrp* and *soxS* by sRNAs.**

**Fig. S2: Effect of sRNA deletions and Hfq on expression of an *lrp::lacZ* fusion during growth.**

**Fig. S3: *lrp* leader and mutations.**

**Fig. S4: Regulation by mutant derivatives of MicF.**

**Fig. S5: Translation of *lrp* deletions and point mutations and regulation by MicF and DsrA.**

**Fig. S6. Effect of GcvB mutations on *lrp* regulation *in vivo*.**

**Fig. S7. *in vitro* interaction of *lrp* and GcvB.**

**Fig. S8: sRNA levels after paraquat treatment.**

**Fig. S9: Deletion analysis of *soxS* fusions.**

**Fig. S10: Mar and Rob sRNA landscapes.**

**SUPPLEMENTARY TABLES:**

**Table S1. Strains and plasmids used in this study.**

**Table S2. Primers and probes used in this study.**

**Table S3. Regulation of mutant and wild-type *lrp* fusions with sRNAs.**

**Table S4. Mutational tests of GcvB regulation of *lrp*.**

**Table S5. Activity of *lrp* translational fusions and *ilvIH* transcriptional fusions in various genetic backgrounds with MOPS glycerol minimal media.**

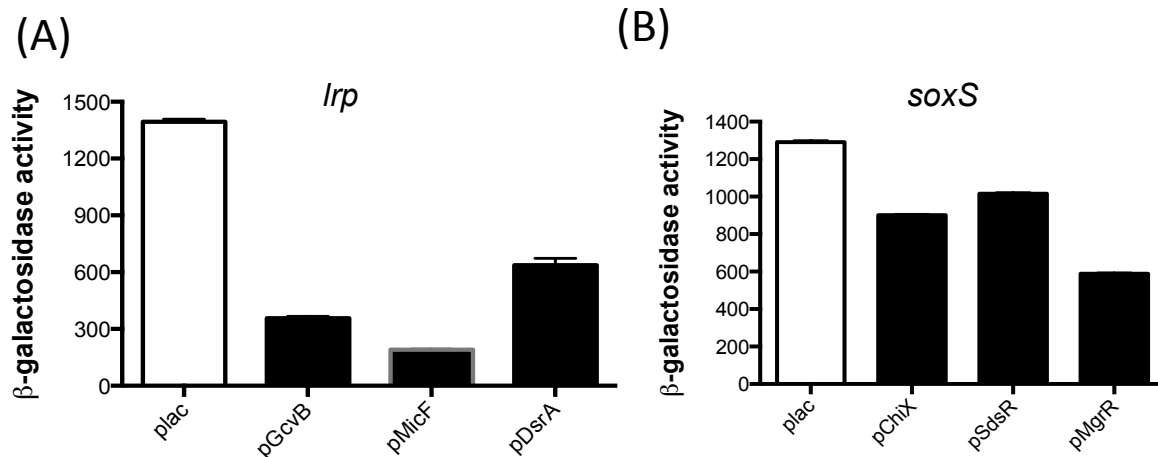

**Fig. S1: Regulation of *lrp* and *soxS* by sRNAs.**

(A) HL1100, a strain carrying the  $P_{BAD}$ -*lrp-lacZ* translational fusion and deletions in *dsrA*, *gcvB* and *micF*, was transformed with plasmids overexpressing GcvB, MicF, or DsrA, or with the pBRplac empty vector. Transformed cells were grown on LB medium containing 100  $\mu$ g/ml ampicillin, 100  $\mu$ M IPTG, and 0.001% arabinose. Samples were collected at stationary phase ( $OD_{600}$  of between 2.5 and 3) and assayed for  $\beta$ -galactosidase.

(B) HL1064, a strain carrying the  $P_{BAD}$ -*soxS-lacZ* translational fusion, was transformed with plasmids overexpression ChiX, SdsR, MgrR, or with the pBRplac empty vector. Transformed cells were grown in LB medium containing 100  $\mu$ g/ml ampicillin, 100  $\mu$ M IPTG, and 0.0002% arabinose. Samples were collected at stationary phase ( $OD_{600}$  of 2.0) and assayed for  $\beta$ -galactosidase. Error bars indicate standard deviation throughout.

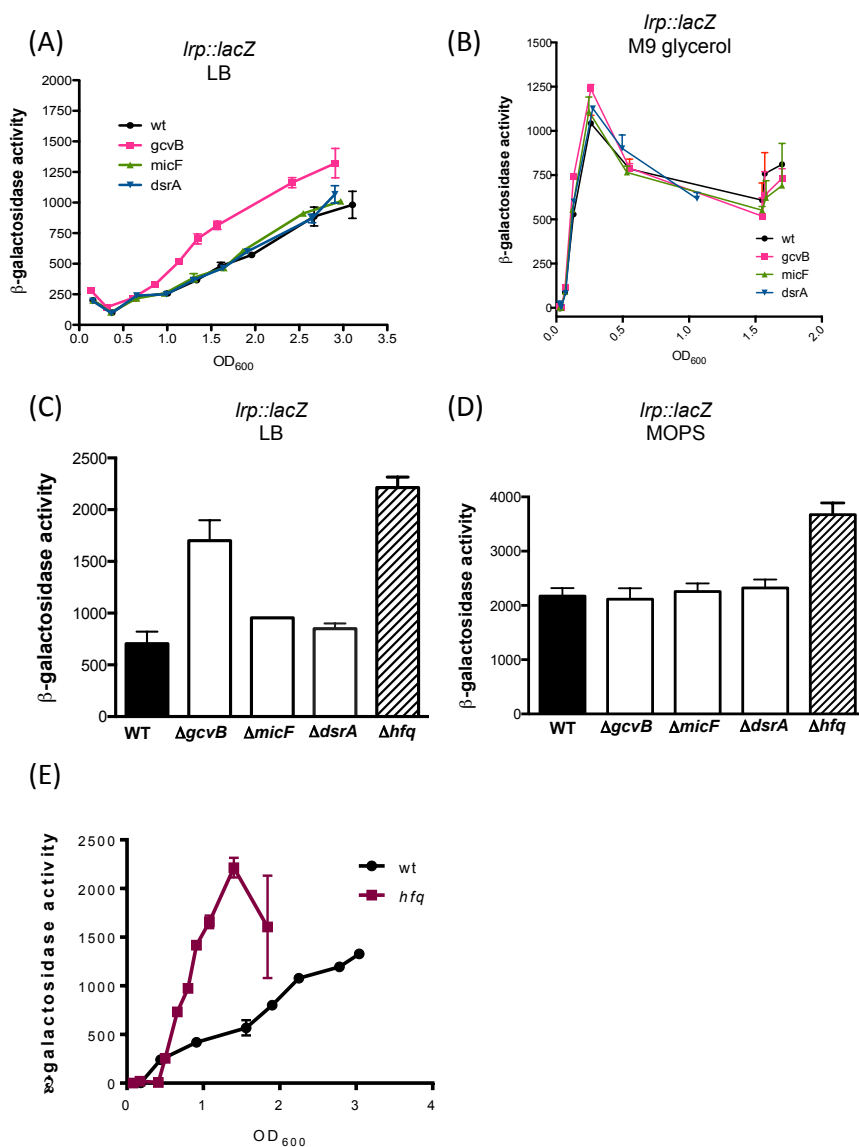

**Fig. S2: Effect of sRNA deletions and Hfq on expression of an *lrp::lacZ* fusion during growth.**

(A, C, E) HL1044 (WT), HL1071 ( $\Delta$ *gcvB*), HL1078 ( $\Delta$ *micF*), HL1108 ( $\Delta$ *dsrA*) and HL1189 ( $\Delta$ *hfq*) cells were grown in LB medium containing 0.001% arabinose and samples collected across the growth curve (A, E) or at OD<sub>600</sub> of 1.5 (C) and assayed for  $\beta$ -galactosidase. Error bars indicate standard deviation.

(B, D) Activity in minimal medium. Strains used in Fig. S2A, C, E were grown on M9 glycerol medium (B) and samples collected across the growth curve or (D) in MOPS (Glycerol) minimal medium containing 0.001% arabinose and samples collected at mid-exponential phase (OD<sub>600</sub> of 0.5) and assayed for  $\beta$ -galactosidase.

```

E. coli -----GGAAGAAA-AAAA 12
Shigella -----ACAATCCCCTGGTGTTTTGGCAAAACATTCGAGGAAGAA-AAAA 43
Salmonella -----GACAATCACCTGCTGTTTGGCAAAACATTCGAGGAAGAA-AAAA 44
Klebsiella TCGATGTTTGGCTTTGACAATCACCTGTGCTTTTGGCAAAACATTCAGGAAGAAGAAA 60
                                         * * * * *

E. coli ACAGTATTCT-TATATGC-GCATAACCATGCATGTAATAACCATGTTTA-CCGTGCTAGT 69
Shigella ACAGTATTCT-TATATGC-GCATAACCATGTATGTAATAACCATGTTTA-CCGTGCTAGT 100
Salmonella -CTGTGTTATGTATGTGCTGCATAATCATGCATGTAATAACCATGTTTA-CCGGGCTAGT 102
Klebsiella GCAGTATTAGCGTGGCGCAATTTTTCATGCACGCAATGCCATTTTATCCGGGTTAAC 120
          * * * * * * * * * * * * * * * * * * * * * * * * * * * * * *

mt13 CTGTC
mt14AB CTGTCA
mt15AB GTCA
E. coli GAAATCTACGTATGGCGTGGACAGACGCCATTCGTGATGTCGATAGCTGCCACAAGGCAA 129
Shigella GAAATCTACGTATGGCGTGGACAGACGCCATTCGTGATGTCGATAGCTGCCACAAGGCAA 160
Salmonella GAAATCTACGCATGGCGTGGACAGACGCCATTCGTGATGTCGATAGCTGCCCGGAGGCAA 162
Klebsiella GAAATCTACGCATGGTGTGGACAGACGCCATTCGTGATGTCGGTACTGCCGTCAGGCAA 180
          ***** * * * * * * * * * * * * * * * * * * * * * * * * * * * * * *

lrpS1 (-89) xxxTTTCGGTCTA
E. coli CGGTCTTCTCACCGTAGACCCAGGCATTCGCGCGCCGTAATCTTCATGA-TTTCGGTCTA 188
Shigella CGGTCTTCTCACCGTAGACCCAGGCATTCGCGCGCCGTAATCTTCATGA-TTTCGGTCTA 219
Salmonella CGGTCTTCTCACCGTAGACCCAGGCATTCGCGCGCCGTAATCCCTCTGGGTTTCGGTCTA 221
Klebsiella CGGGCTTCTCAC-GTACCCCTGGG--TTACCCAATGT-----CGTACGGGT---GAT--A 227
          *** ***** * * * * * * * * * * * * * * * * * * * * * * * * * * * * * *

lrpS4(-40) xxxTCAGA-CAGGAGTAGGGAAG
lrpS3(-69) xxxTAGCGACTCTGAACAGTGTGTTT-CAGGGTCAGA-CAGGAGTAGGGAAG
lrpS5(-35) xxxCAGGAGTAGGGAAG
mt10 CT GCT
mt12 GTCCCA
mt11 C C
mt8 CT GTC
mt14AB CT GTCB
mt15AB GTCB
mt4: CT GTCC C
E. coli TCGTGACGGGTAGCGACTCTGAACAGTGTGTTT-CAGGGTCAGA-CAGGAGTAGGGAAG 246
Shigella TCGTGACGGGTAGCGACTCTGAACAGTGTGTTT-CAGGGTCAGA-CAGGAGTAGGGAAG 277
Salmonella TCGTGATGGGCAGCGACTCTGAACAGTGTGAGTAGAGTCAGG-CAGGAGTAGGGAAG 280
Klebsiella ACAGGATGGG-----CTCTGG-CAGTGAAGGCT-CAGAGCCGGAACAGGAGTAGGGAAG 279
          * * * * * * * * * * * * * * * * * * * * * * * * * * * * * *

lrpS2(-18) xxxTACAGAGACAATAATAATGGTAGATAGCAAGAAGCGCCCTGGCAAAGATCTCGAC
Modi et al (mt7): TGTT
mt9 TGTC
mt5 (DsrA): CG C CG
mt1 (MicF): CGACCT
E. coli GAATACAGAGAGACAATAATAATGGTAGATAGCAAGAAGCGCCCTGGCAAAGATCTCGAC 306
Shigella GAATACAGAGAGACAATAATAATGGTAGATAGCAAGAAGCGCCCTGGCAAAGATCTCGAC 337
Salmonella GAATACAGAGAGACAATAATAATGGTAGATAGCAAGAAGCGCCCTGGCAAAGATCTCGAC 340
Klebsiella GAATACAGAGAGACAATAATAATGGTAGATAGCAAGAAGCGCCCTGGCAAAGATCTCGAC 339
          *****

```

**Fig. S3. *lrp* leader and mutations:**

Alignment of *lrp* leader showing deletions and mutants discussed in this work above the sequence lines. Deletions are shown with XXX in front of the



remaining sequence. The region within the *Salmonella* leader predicted by Sharma et al (1) to base pair with GcvB sequence is highlighted in dark grey with white lettering; the region predicted by Modi et al (2) is highlighted in light grey. Two potential Hfq binding sites (ARN repeats) are shown with blue letters; one overlaps the initiating ATG of the Lrp open reading frame as well as the site predicted by Modi et al, while the other is close to one site of GcvB binding. The ATG is highlighted in green. The GACAG repeats protected by GcvB in vitro (BS1 and BS2) are highlighted in yellow. Double mutants at the BS1 and BS2 sites are shown with an A or B superscript to indicate existence of a second region of the mutation elsewhere. A possible ORF within the leader, pointed out by a reviewer, is underlined.

Fig. S4.

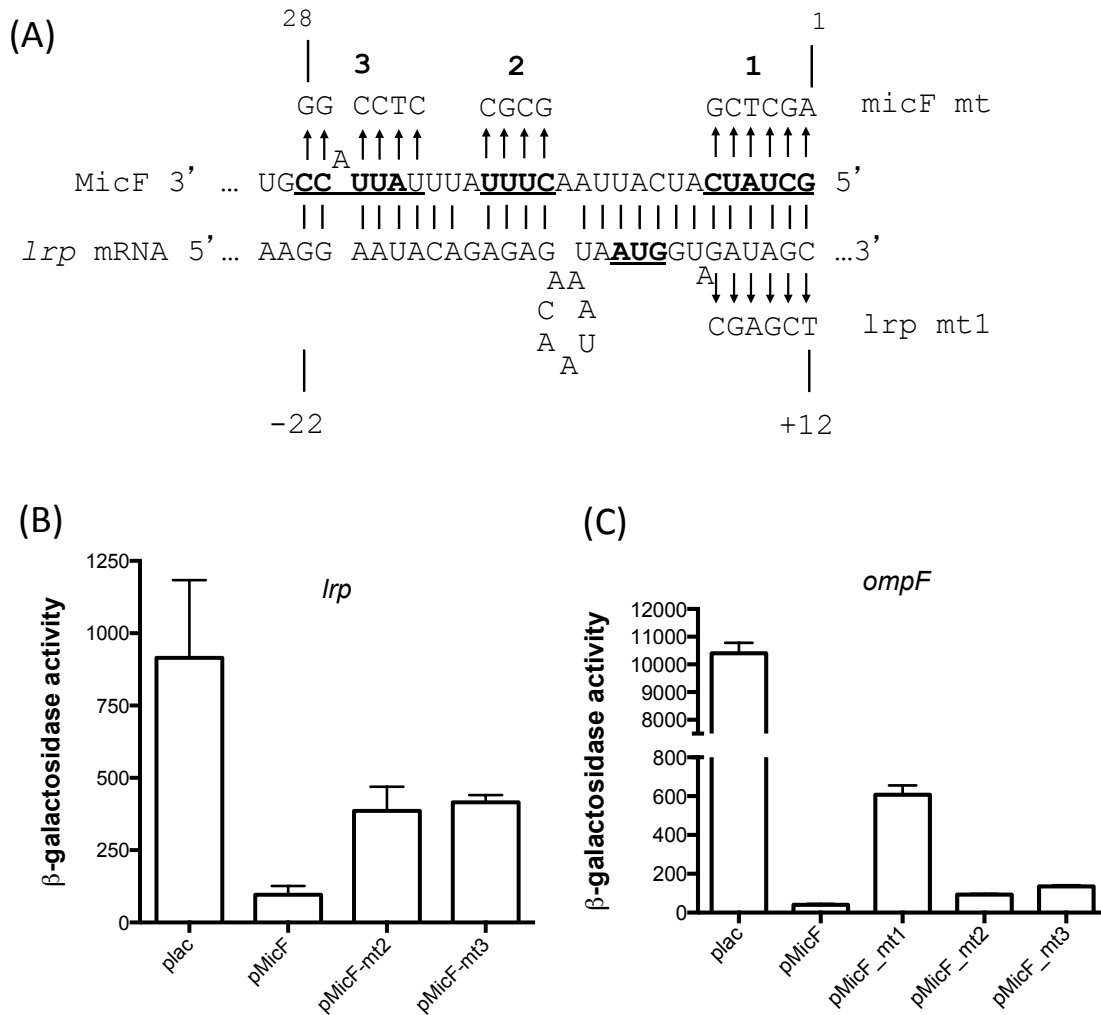**Fig. S4. Regulation by mutant derivatives of MicF.**

(A) Pairing predicted between MicF and *lrp*, with nucleotides mutated in MicF underlined and changes to MicF shown above the sequence.

(B)  $\beta$ -galactosidase activity from cells with *lrp-lacZ* (HL1044) translational fusions, in the presence of plasmids that either overexpress wild-type pMicF or mutant MicF as indicated. Cells were grown in LB Ampicillin with IPTG, at 37°C, to OD<sub>600</sub> 2.5. Error bars indicate standard deviation.

(C)  $\beta$ -galactosidase activity of strain HL1214 (pBAD-*ompF-lacZ*) transformed with plasmids overexpressing MicF or MicF\_mt1, MicF\_mt2, MicF\_mt3, or with the pBRplac empty vector. Cells were grown in LB Ampicillin with IPTG, at 37°C, to OD<sub>600</sub> 2.5-3. Error bars indicate standard deviation.

Fig. S5.

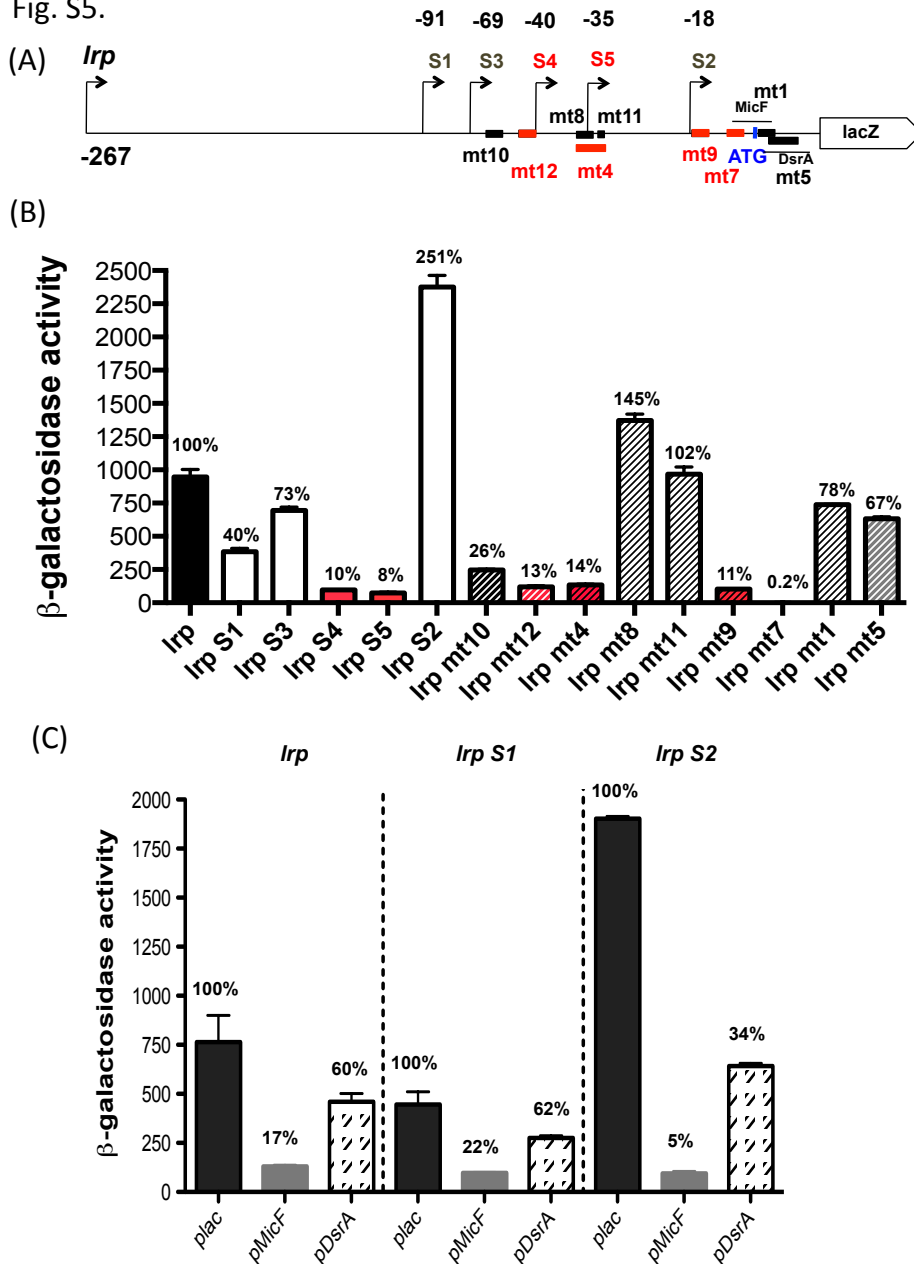

**Fig. S5. Translation of *lrp* deletions and point mutations and regulation by MicF and DsrA.**

(A) Schematic of end-points of deletions (arrows) and point mutations (heavy bars) on the *lrp* 5' UTR and initial region of the ORF. Bars and labels in red are those with <15% wild-type activity (data in (B)). Initiating ATG is in blue, with a blue bar on the schematic.

(B) A set of strains carrying deletions or point mutations in the *lrp* leader, wild type for all sRNAs, were grown in LB medium containing 0.001% arabinose at 37°C to OD<sub>600</sub> of 2.5 and β-galactosidase activity from the *lrp-lacZ* fusion was measured. Percentage expression compared to WT is shown on top of each bar. Deletions have clear bars; point mutations are hatched bars. Deletions or mutants with less than 15% of wild-type have red fill. Sequence changes for mutants (*lrp\_mt*) and end points for deletions (*lrp* S1-S5) are shown in Fig. S3. Strains: *lrp* (HL1044), *lrp S1* (HL1503), *lrp S2* (HL1505), *lrp S3* (HL1695), *lrp S4* (HL1696), *lrp S5* (HL1697), *lrp mt1* (HL1079), *lrp mt4* (HL1149), *lrp mt5* (HL1150), *lrp mt7* (HL1551), *lrp mt8* (HL1693), *lrp mt9* (HL1694), *lrp mt10* (HL1717), *lrp mt11* (HL1731), and *lrp mt12* (HL1732)-*lacZ* translational fusions. Error bars indicate standard deviation.

(C) β-galactosidase activity from cells carrying full-length and truncated (*lrp\_S1* and *lrp\_S2*; see Fig. 3 and Fig. S3) *lrp-lacZ* translational fusions. All strains are deleted for *gcvB* and were transformed with either the empty vector (plac), the plac-MicF plasmid (pMicF) or the plac-DsrA plasmid (pDsrA). Cells were grown in LB medium containing ampicillin, 100 μM IPTG, and 0.001% arabinose at 37°C. Samples are collected at OD<sub>600</sub> of between 1.5 and 2) and assayed for β-galactosidase. Strains used: *lrp* (HL1071), *lrp S1* (HL1517), and *lrp S2* (HL1518)-*lacZ* translational fusions.

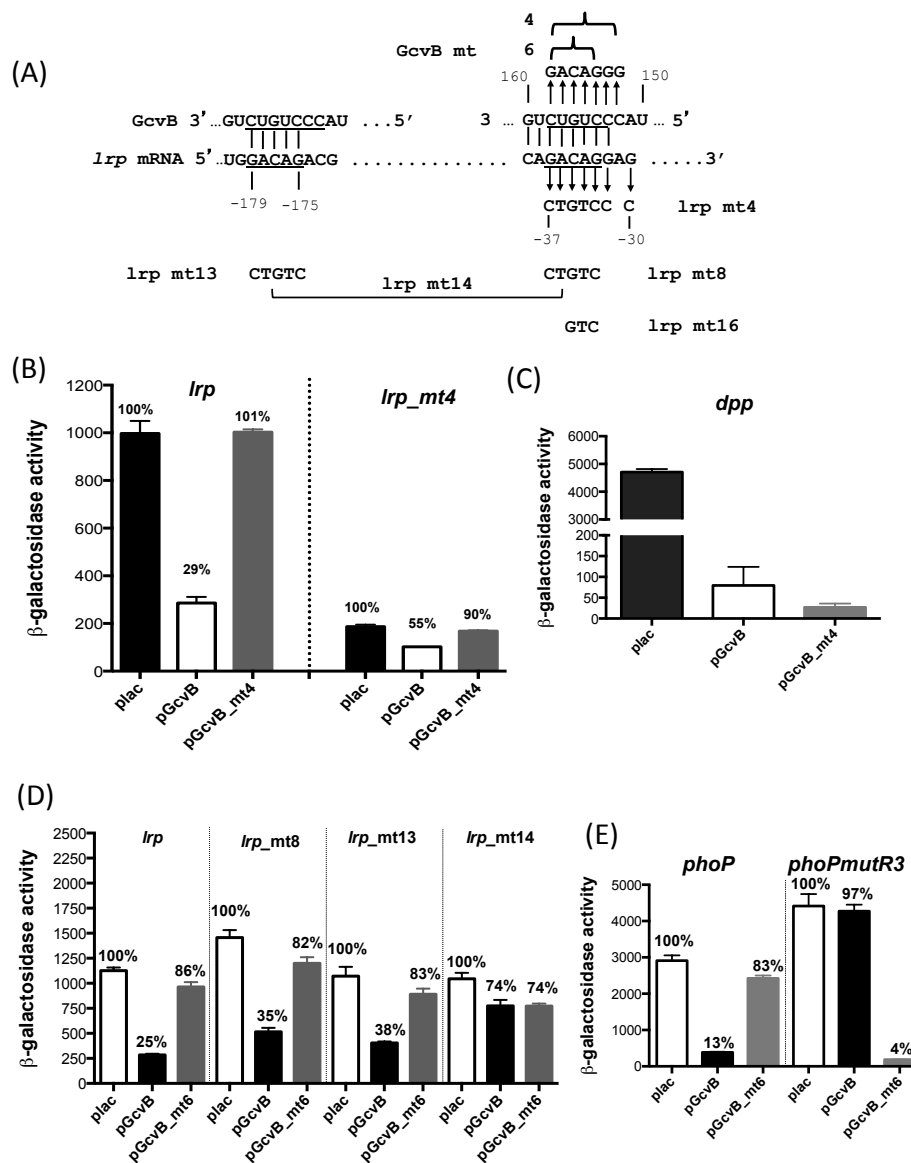

**Fig. S6. Effect of GcvB mutations on *lrp* regulation.**

(A) Predicted pairing between GcvB and two regions of the *lrp* 5' UTR. Numbering for the *lrp* sequences are with respect to the translation start codon. Mutants used in panels are shown.

(B)  $\beta$ -galactosidase activity from cells with *lrp-lacZ* (HL1071) and *lrp\_mt4-lacZ* (HL1525) translational fusion plasmids, in the presence of plasmids that either overexpress wild-type pGcvB or pGcvB\_mt4. Cells were grown at 37°C to stationary phase (OD<sub>600</sub> of 2.5) and assayed. Error bars indicate standard deviation throughout.

(C)  $\beta$ -galactosidase activity from cells with *dppA-lacZ* (KM339) translational fusion plasmids, in the presence of plasmids that either overexpress wild-type GcvB or GcvB\_mt4.

(D)  $\beta$ -galactosidase activity from cells with *lrp* (HL1071), *lrpmt8* (HL1699), *lrpmt13* (HL1803), and *lrpmt14* (HL1804)-*lacZ* translational fusions, in the presence of plasmid overexpressing GcvB or GcvB\_mt6 or with the pBRplac empty vector. Normalization of each *lrp* fusion to the vector control is shown.

(E)  $\beta$ -galactosidase activity from cells with *phoP::lacZ* (MG1521) or *phoPmutR3::lacZ* (MG1586) translational fusions, assayed in the presence of plasmids carrying either wild-type GcvB, GcvB\_mt6 (identical to mutant described by Coornaert et al (3), or a vector. All strains were grown and assayed as in Fig. 2; strains are described in Coornaert et al (3).

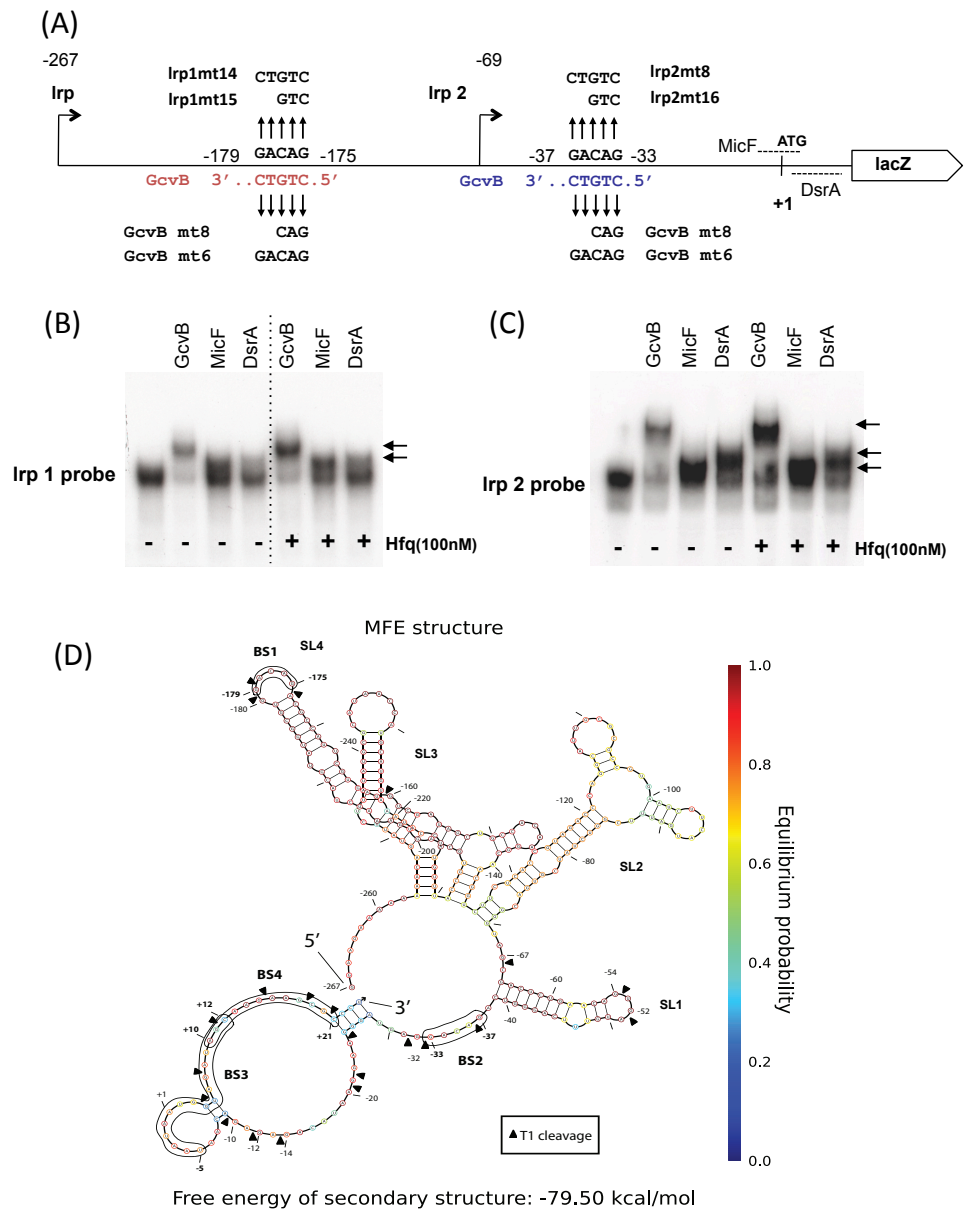

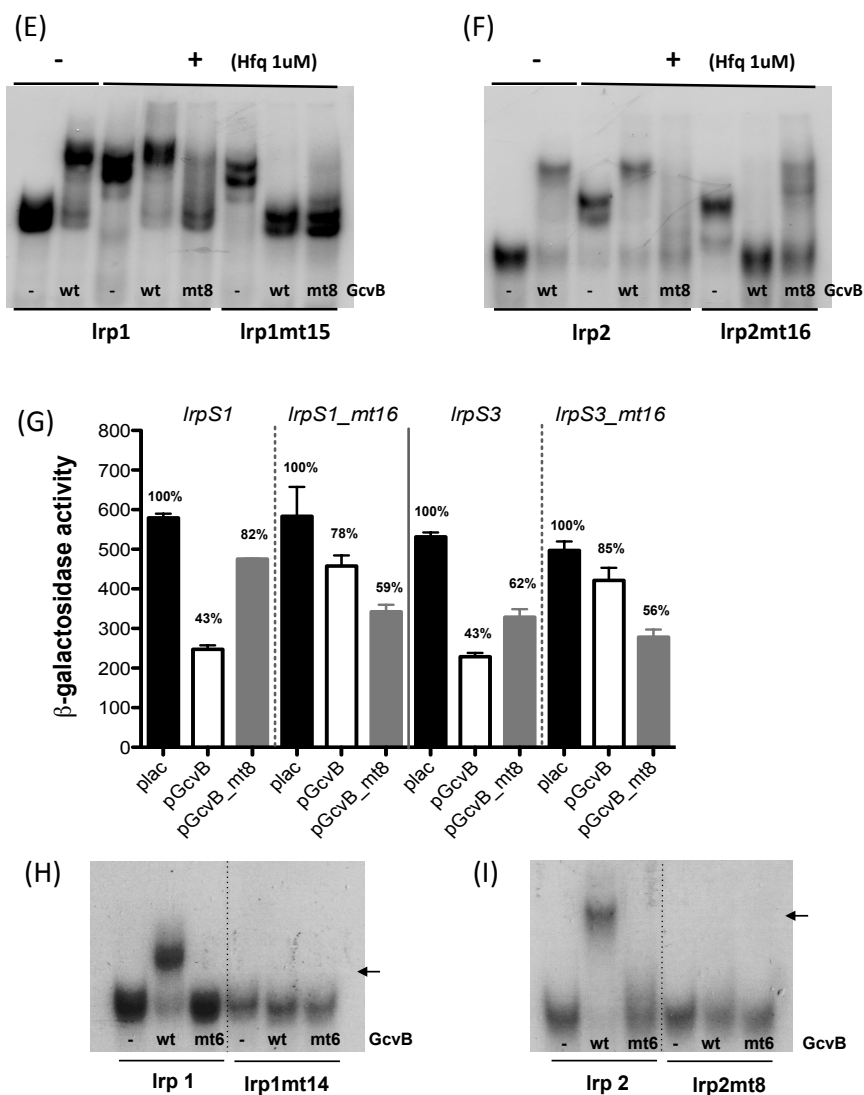

**Fig. S7. *in vitro* interaction of *lrp* and sRNAs.**

(A) Schematic of *lrp* 5' UTR and regions mutated for *in vitro* analysis (*lrp1mt14*, *lrp1mt15*, *lrp2mt8*, *lrp2mt16*), and pairing to wild-type and mutant *GcvB\_mt8* and *GcvB\_mt6*.

(B, C) Gel-mobility shift assays were carried out with each small RNA and either the full 5' UTR, *lrp1* (from -267 to +60 relative to the ATG) (A) or a portion of the 5' UTR, *lrp2* (from -69 to +60 relative to the ATG) (B) *in vitro*.  $^{32}\text{P}$  labeled *lrp* RNAs were incubated with each unlabeled small RNA with or without 100 nM of Hfq protein.

(D) Summary of *in vitro* structure probing experiments (see Fig. 5) on predicted secondary structure for RNA of wild-type *lrp* 5' UTR and initial translated region. Small RNA binding regions on *lrp* strand are indicated as



binding site (BS1, 2, 3, and 4). Positions cleaved after G nucleotides indicated with filled triangles (RNase T1).

(E, F) Gel shift, as for B, C, using both wild-type *lrp*, *lrpmt15* and *lrpmt16* derivatives (see panel A), with wild-type GcvB or GcvB\_mt8.

(G)  $\beta$ -galactosidase activity from cells with *lrpS1* (HL1517), *lrpS1mt16* (HL1815), *lrpS3* (HL1701), and *lrpS3mt16* (HL1816)-*lacZ* translational fusions, in the presence of plasmid overexpressing GcvB or GcvB\_mt8 or with the pBRplac empty vector. Error bars indicate standard deviation.

(H) Gel-mobility shift assays as for B, C, but with wild-type *lrp*, *lrpmt14*, and *lrpmt8* derivatives (see panel A), with wild-type small RNA GcvB or GcvB\_mt6.

Fig. S8.

(A)

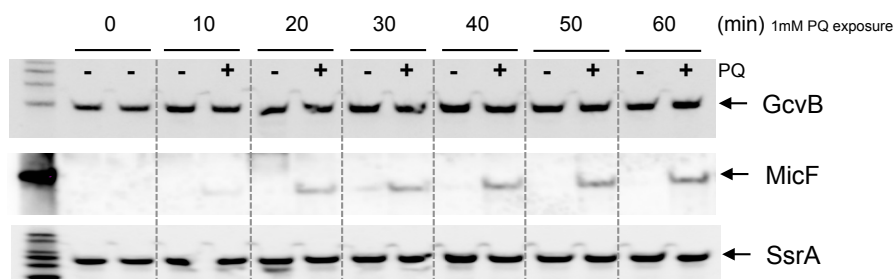

(B)

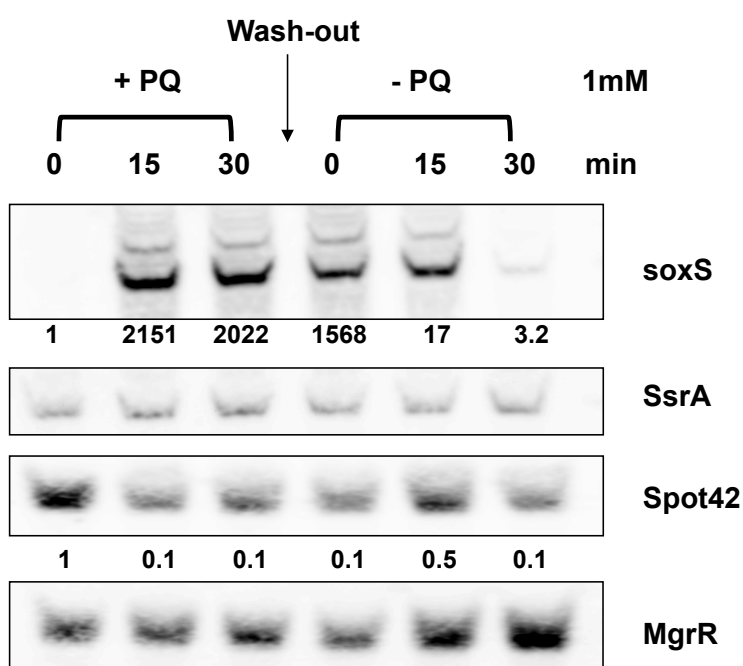**Fig. S8: sRNA levels after paraquat treatment.**

- (A) Paraquat effects on GcvB and MicF sRNAs. Cells (MG1655) were grown in LB (to  $OD_{600}$  of 0.5) and treated with or without 1.0 mM paraquat and allowed to grow for the times indicated. RNA was extracted and probed for GcvB, MicF and SsrA (as a loading control) as described in Materials and Methods.
- (B) Paraquat effect on MgrR and *soxS*. MG1655 cells were grown in LB, treated with paraquat for 30 minutes, filtered to remove the paraquat and resuspended and grown. Samples were taken as indicated and analyzed by Northern blot.

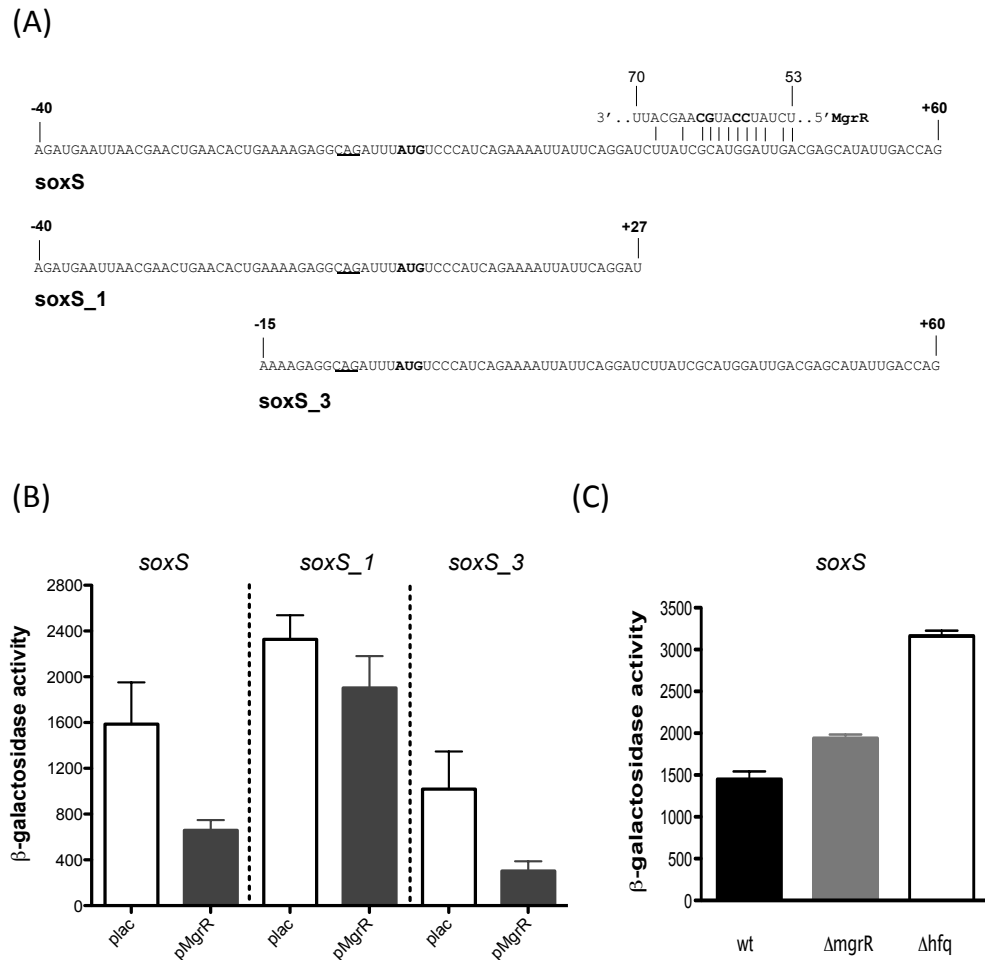

**Fig. S9. Deletion analysis of *soxS* fusions.**

(A) Sequence of *soxS* 5' UTR and initial translated region to +60 is included in translational fusion and truncated derivatives. Predicted pairing with MgrR is shown. Translation initiation AUG is underlined.

(B) The translational fusions shown in A, *soxS* (HL1064), *soxS\_1* (HL1117), and *soxS\_3* (HL1698) were grown to an OD<sub>600</sub> of 3 in LB medium containing ampicillin, 100  $\mu$ M IPTG, and 0.0002% arabinose and assayed for  $\beta$ -galactosidase in the presence of the vector or plasmid expressing MgrR. Error bars indicate standard deviation throughout.

(C) Derivatives of the *soxS* translational fusion containing deletion of *mgrR* (HL1099) or *hfq* (HL1190) were grown to an OD<sub>600</sub> of 3 in LB medium containing ampicillin, 100  $\mu$ M IPTG, and 0.0002% arabinose and assayed for  $\beta$ -galactosidase.

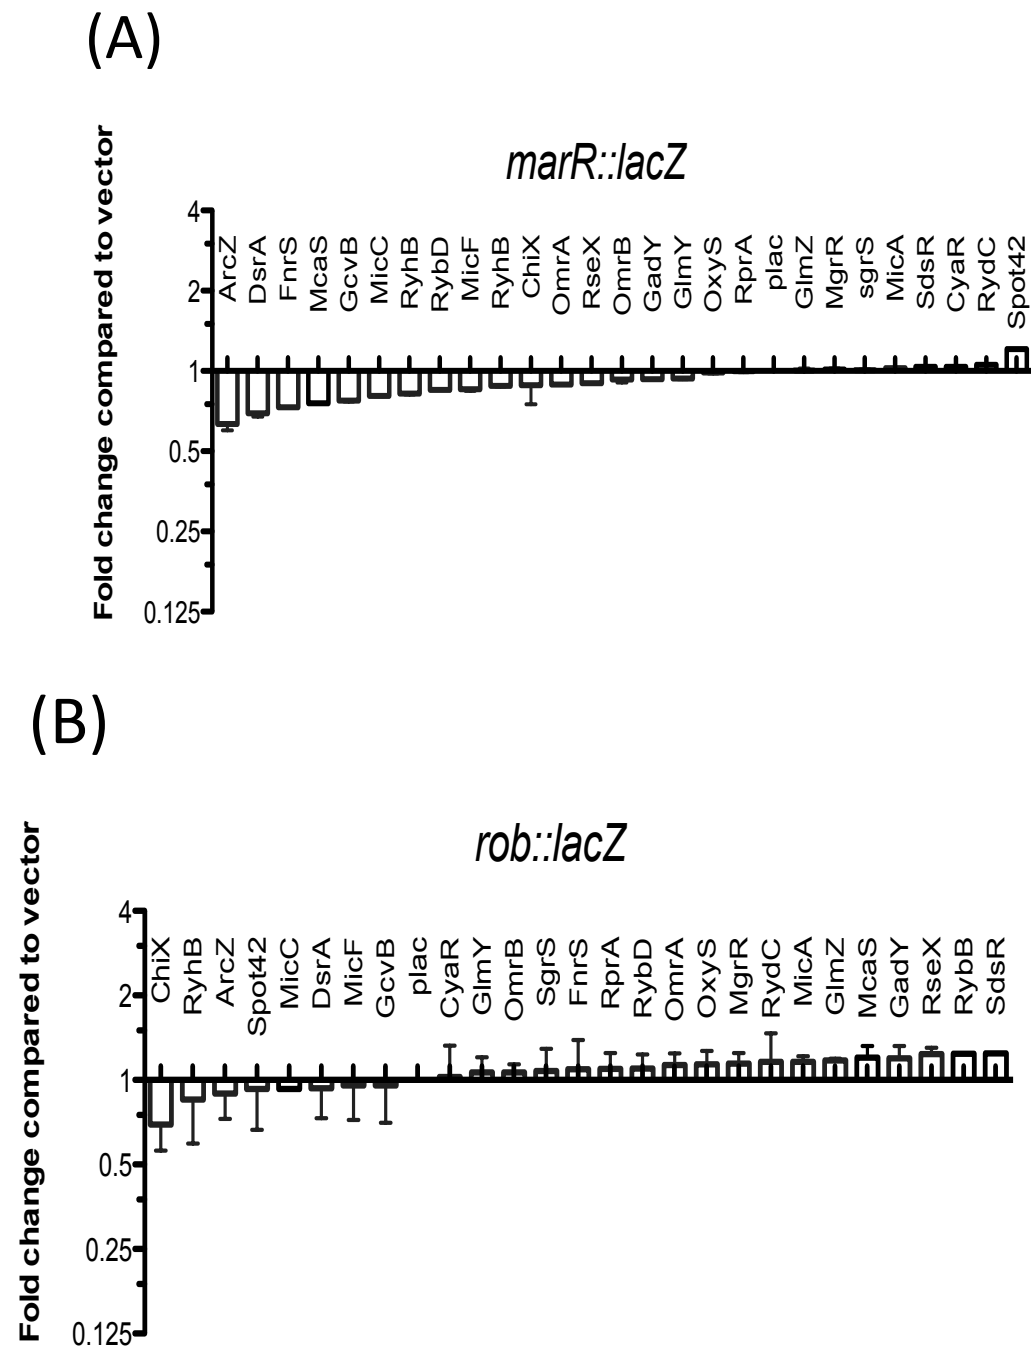

**Fig. S10: Mar, Rob sRNA landscapes.**

Strains carrying either the (A) *marR::lacZ* (HL1667) or (B) *rob::lacZ* translational fusion (HL1065) were grown and assayed in the presence of the sRNA plasmid library as for Fig. 1.

## Supplementary Tables

Table S1. Strains and plasmids used in this study.

| Strain or plasmid | Description                                                                                                                                                                         | Reference or Source                            |
|-------------------|-------------------------------------------------------------------------------------------------------------------------------------------------------------------------------------|------------------------------------------------|
| Strains           |                                                                                                                                                                                     |                                                |
| MG1655            | Wild type <i>E. coli</i>                                                                                                                                                            | Laboratory strain                              |
| PM1205            | MG1655 <i>mal::lacI<sup>f</sup></i><br><i>ΔaraBAD araC<sup>+</sup></i><br><i>lacI'::P<sub>BAD</sub>-cat-sacB-lacZ</i> ,<br>mini- $\lambda$ tet <sup>R</sup> , $\phi$ 80 lysogen     | (4)                                            |
| PM1805            | MG1655 <i>mal::lacI<sup>f</sup></i><br><i>ΔaraBAD araC<sup>+</sup></i><br><i>lacI'::P<sub>BAD</sub>-cat-sacB-lacZ</i> ,<br>mini- $\lambda$ tet <sup>R</sup> <i>trpE<sup>+</sup></i> | PM1205 without $\phi$ 80                       |
| KM339             | MG1655 <i>mal::lacI<sup>f</sup></i> <i>ΔaraBAD</i><br><i>araC<sup>+</sup> lacI'::P<sub>BAD</sub>-dppA-lacZ</i>                                                                      | (5)                                            |
| HL1044            | MG1655 <i>mal::lacI<sup>f</sup></i> <i>ΔaraBAD</i><br><i>araC<sup>+</sup> lacI'::P<sub>BAD</sub>-lrp-lacZ</i>                                                                       | PM1205 + PCR<br>(PBAD-LRP-F +<br>lacZ-LRP-R)   |
| HL1061            | MG1655 <i>mal::lacI<sup>f</sup></i> <i>ΔaraBAD</i><br><i>araC<sup>+</sup> lacI'::P<sub>BAD</sub>-hns-lacZ</i>                                                                       | PM1205 + PCR<br>(PBAD-HNS-F +<br>lacZ-HNS-R)   |
| HL1064            | MG1655 <i>mal::lacI<sup>f</sup></i> <i>ΔaraBAD</i><br><i>araC<sup>+</sup> lacI'::P<sub>BAD</sub>-soxS-lacZ</i>                                                                      | PM1205 + PCR<br>(PBAD-SOXS-F +<br>lacZ-SOXS-R) |
| HL1065            | MG1655 <i>mal::lacI<sup>f</sup></i> <i>ΔaraBAD</i><br><i>araC<sup>+</sup> lacI'::P<sub>BAD</sub>-rob-lacZ</i>                                                                       | PM1205 + PCR<br>(PBAD-ROB-F +<br>lacZ-ROB-R)   |
| HL1069            | MG1655 <i>mal::lacI<sup>f</sup></i> <i>ΔaraBAD</i><br><i>araC<sup>+</sup> lacI'::P<sub>BAD</sub>-fnr-lacZ</i>                                                                       | PM1205 + PCR<br>(PBAD-FNR-F +<br>lacZ-FNR-R)   |
| HL1070            | MG1655 <i>mal::lacI<sup>f</sup></i> <i>ΔaraBAD</i><br><i>araC<sup>+</sup> lacI'::P<sub>BAD</sub>-crp-lacZ</i>                                                                       | PM1205 + PCR<br>(PBAD-CRP-F +<br>lacZ-CRP-R)   |
| HL1071            | MG1655 <i>mal::lacI<sup>f</sup></i><br><i>ΔaraBAD araC<sup>+</sup></i><br><i>lacI'::P<sub>BAD</sub>-lrp-lacZ</i><br><i>ΔgcvB::kan</i>                                               | HL1044 +<br>P1( $\Delta$ <i>gcvB::kan</i> )    |
| HL1078            | MG1655 <i>mal::lacI<sup>f</sup></i><br><i>ΔaraBAD araC<sup>+</sup></i><br><i>lacI'::P<sub>BAD</sub>-lrp-lacZ</i><br><i>ΔmicF::cat</i>                                               | HL1044 +<br>P1( $\Delta$ <i>micF::cat</i> )    |
| HL1079            | MG1655 <i>mal::lacI<sup>f</sup></i><br><i>ΔaraBAD araC<sup>+</sup></i>                                                                                                              | PM1205 + PCR (lrp<br>mt1)                      |

|        |                                                                                                                                                                                                                                                                |                                                                       |
|--------|----------------------------------------------------------------------------------------------------------------------------------------------------------------------------------------------------------------------------------------------------------------|-----------------------------------------------------------------------|
|        | <i>lacI'</i> ::P <sub>BAD</sub> - <i>lrp mt1-lacZ</i>                                                                                                                                                                                                          |                                                                       |
| HL1083 | MG1655 <i>mal</i> :: <i>lacI'</i> <sup>q</sup><br>$\Delta$ <i>araBAD araC</i> <sup>+</sup><br><i>lacI'</i> ::P <sub>BAD</sub> - <i>lrp-lacZ</i><br>$\Delta$ <i>gcvB</i> :: <i>kan</i> $\Delta$ <i>micF</i> :: <i>cat</i>                                       | HL1071 +<br>P1( $\Delta$ <i>micF</i> :: <i>cat</i> )                  |
| HL1098 | MG1655 <i>mal</i> :: <i>lacI'</i> <sup>q</sup><br>$\Delta$ <i>araBAD araC</i> <sup>+</sup><br><i>lacI'</i> ::P <sub>BAD</sub> - <i>soxS-lacZ</i> ,<br>$\Delta$ <i>spf</i> :: <i>cat</i>                                                                        | HL1064 +<br>P1( $\Delta$ <i>spf</i> :: <i>cat</i> )                   |
| HL1099 | MG1655 <i>mal</i> :: <i>lacI'</i> <sup>q</sup><br>$\Delta$ <i>araBAD araC</i> <sup>+</sup><br><i>lacI'</i> ::P <sub>BAD</sub> - <i>soxS-lacZ</i><br>$\Delta$ <i>mgrR</i> :: <i>kan</i>                                                                         | HL1064 +<br>P1( $\Delta$ <i>mgrR</i> :: <i>kan</i> )                  |
| HL1100 | MG1655 <i>mal</i> :: <i>lacI'</i> <sup>q</sup><br>$\Delta$ <i>araBAD araC</i> <sup>+</sup><br><i>lacI'</i> ::P <sub>BAD</sub> - <i>lrp-lacZ</i><br>$\Delta$ <i>gcvB</i> :: <i>kan</i> $\Delta$ <i>micF</i> :: <i>cat</i><br>$\Delta$ <i>dsrA</i> :: <i>tet</i> | HL1083 +<br>P1( $\Delta$ <i>dsrA</i> :: <i>tet</i> )                  |
| HL1108 | MG1655 <i>mal</i> :: <i>lacI'</i> <sup>q</sup><br>$\Delta$ <i>araBAD araC</i> <sup>+</sup><br><i>lacI'</i> ::P <sub>BAD</sub> - <i>lrp-lacZ</i><br>$\Delta$ <i>dsrA</i> :: <i>tet</i>                                                                          | HL1044 +<br>P1( $\Delta$ <i>dsrA</i> :: <i>tet</i> )                  |
| HL1117 | MG1655 <i>mal</i> :: <i>lacI'</i> <sup>q</sup><br>$\Delta$ <i>araBAD araC</i> <sup>+</sup><br><i>lacI'</i> ::P <sub>BAD</sub> - <i>soxS 1-lacZ</i>                                                                                                             | PM1205 + PCR<br>(P <sub>BAD</sub> -SOXS-F +<br><i>lacZ</i> -SOXS_1-R) |
| HL1123 | MG1655 <i>mal</i> :: <i>lacI'</i> <sup>q</sup><br>$\Delta$ <i>araBAD araC</i> <sup>+</sup><br><i>lacI'</i> ::P <sub>BAD</sub> - <i>cat-sacB-lacZ</i> ,<br>mini- $\lambda$ <i>tet</i> <sup>R</sup> , <i>araE'</i>                                               | PM1205 + <i>araE'</i> (6)                                             |
| HL1131 | MG1655 <i>mal</i> :: <i>lacI'</i> <sup>q</sup><br>$\Delta$ <i>araBAD araC</i> <sup>+</sup><br><i>lacI'</i> ::P <sub>BAD</sub> - <i>soxS-lacZ</i> ,<br>$\Delta$ <i>spf</i> :: <i>cat</i> , <i>araE'</i>                                                         | HL1098 + <i>araE'</i> (6)                                             |
| HL1149 | MG1655 <i>mal</i> :: <i>lacI'</i> <sup>q</sup><br>$\Delta$ <i>araBAD araC</i> <sup>+</sup><br><i>lacI'</i> ::P <sub>BAD</sub> - <i>lrp mt4-lacZ</i>                                                                                                            | PM1205 + PCR ( <i>lrp</i><br><i>mt4</i> )                             |
| HL1150 | MG1655 <i>mal</i> :: <i>lacI'</i> <sup>q</sup><br>$\Delta$ <i>araBAD araC</i> <sup>+</sup><br><i>lacI'</i> ::P <sub>BAD</sub> - <i>lrp mt5-lacZ</i>                                                                                                            | PM1205 + PCR ( <i>lrp</i><br><i>mt5</i> )                             |
| HL1151 | MG1655 <i>mal</i> :: <i>lacI'</i> <sup>q</sup><br>$\Delta$ <i>araBAD araC</i> <sup>+</sup><br><i>lacI'</i> ::P <sub>BAD</sub> - <i>lrp mt5-lacZ</i><br>$\Delta$ <i>micF</i> :: <i>cat</i>                                                                      | HL1150 +<br>P1( $\Delta$ <i>micF</i> :: <i>cat</i> )                  |
| HL1152 | MG1655 <i>mal</i> :: <i>lacI'</i> <sup>q</sup><br>$\Delta$ <i>araBAD araC</i> <sup>+</sup>                                                                                                                                                                     | HL1151 +<br>P1( $\Delta$ <i>gcvB</i> :: <i>kan</i> )                  |

|        |                                                                                                                                                                                                                           |                                                |
|--------|---------------------------------------------------------------------------------------------------------------------------------------------------------------------------------------------------------------------------|------------------------------------------------|
|        | <i>lacI</i> ::P <sub>BAD</sub> - <i>lrp mt5-lacZ</i><br><i>ΔmicF</i> :: <i>cat ΔgcvB</i> :: <i>kan</i>                                                                                                                    |                                                |
| HL1154 | MG1655 <i>mal</i> :: <i>lacI</i> <sup>f</sup><br><i>ΔaraBAD araC</i> <sup>+</sup><br><i>lacI</i> ::P <sub>BAD</sub> - <i>lrp mt5-lacZ</i><br><i>ΔmicF</i> :: <i>cat ΔgcvB</i> :: <i>kan</i><br><i>ΔdsrA</i> :: <i>tet</i> | HL1152 +<br>P1( <i>ΔdsrA</i> :: <i>tet</i> )   |
| HL1189 | MG1655 <i>mal</i> :: <i>lacI</i> <sup>f</sup><br><i>ΔaraBAD araC</i> <sup>+</sup><br><i>lacI</i> ::P <sub>BAD</sub> - <i>lrp-lacZ</i><br><i>Δhfq</i> :: <i>cat</i>                                                        | HL1044 +<br>P1( <i>Δhfq</i> :: <i>cat</i> )    |
| HL1190 | MG1655 <i>mal</i> :: <i>lacI</i> <sup>f</sup><br><i>ΔaraBAD araC</i> <sup>+</sup><br><i>lacI</i> ::P <sub>BAD</sub> - <i>soxS-lacZ</i><br><i>Δhfq</i> :: <i>cat</i>                                                       | HL1064 +<br>P1( <i>Δhfq</i> :: <i>cat</i> )    |
| HL1213 | MG1655 <i>mal</i> :: <i>lacI</i> <sup>f</sup><br><i>ΔaraBAD araC</i> <sup>+</sup><br><i>lacI</i> ::P <sub>BAD</sub> - <i>ilvIH-lacZ</i>                                                                                   | PM1205 + PCR(ilvIH<br>-327F + ilvIH +33R)      |
| HL1214 | MG1655 <i>mal</i> :: <i>lacI</i> <sup>f</sup><br><i>ΔaraBAD araC</i> <sup>+</sup><br><i>lacI</i> ::P <sub>BAD</sub> - <i>ompF-lacZ</i>                                                                                    | PM1205 +<br>PCR(PBAD-ompF-F<br>+ lacZ-ompF-R)  |
| HL1231 | MG1655 <i>mal</i> :: <i>lacI</i> <sup>f</sup><br><i>ΔaraBAD araC</i> <sup>+</sup><br><i>lacI</i> ::P <sub>BAD</sub> - <i>ilvIH-lacZ</i><br><i>Δlrp</i> :: <i>kan</i>                                                      | HL1213 +<br>P1( <i>Δlrp</i> :: <i>kan</i> )    |
| HL1232 | MG1655 <i>mal</i> :: <i>lacI</i> <sup>f</sup><br><i>ΔaraBAD araC</i> <sup>+</sup><br><i>lacI</i> ::P <sub>BAD</sub> - <i>ilvIH-lacZ</i><br><i>ΔmicF</i> :: <i>cat</i>                                                     | HL1213 +<br>P1( <i>ΔmicF</i> :: <i>cat</i> )   |
| NM1100 | MG1655 mini-λ-Red-tet                                                                                                                                                                                                     | (7)                                            |
| HL1235 | MG1655 <i>lrp</i> ::SPA::kan                                                                                                                                                                                              | NM1100 +<br>PCR(Lrp_SPA_F +<br>Lrp_SPA_R)      |
| HL1434 | MG1655 <i>lrp</i> ::SPA                                                                                                                                                                                                   | HL1235 pCP20                                   |
| HL1437 | MG1655 <i>lrp</i> ::SPA<br><i>ΔmicF</i> :: <i>cat</i>                                                                                                                                                                     | HL1434 +<br>P1( <i>ΔmicF</i> :: <i>cat</i> )   |
| HL1438 | MG1655 <i>lrp</i> ::SPA<br><i>ΔgcvB</i> :: <i>kan</i>                                                                                                                                                                     | HL1434 +<br>P1( <i>ΔgcvB</i> :: <i>kan</i> )   |
| HL1440 | MG1655 <i>lrp</i> ::SPA<br><i>ΔgcvB</i> :: <i>kan ΔmicF</i> :: <i>cat</i>                                                                                                                                                 | HL1438 +<br>P1( <i>ΔmicF</i> :: <i>cat</i> )   |
| HL1503 | MG1655 <i>mal</i> :: <i>lacI</i> <sup>f</sup><br><i>ΔaraBAD araC</i> <sup>+</sup><br><i>lacI</i> ::P <sub>BAD</sub> - <i>lrp S1-lacZ</i><br><i>trpE</i> <sup>+</sup>                                                      | PM1805 + PCR<br>(PBADlrp_S1_F +<br>lacZ-LRP-R) |
| HL1505 | MG1655 <i>mal</i> :: <i>lacI</i> <sup>f</sup>                                                                                                                                                                             | PM1805 + PCR                                   |

|        |                                                                                                                                                                                    |                                              |
|--------|------------------------------------------------------------------------------------------------------------------------------------------------------------------------------------|----------------------------------------------|
|        | <i>ΔaraBAD araC<sup>+</sup></i><br><i>lacI<sup>q</sup>::P<sub>BAD</sub>-lrp S2-lacZ</i><br><i>trpE<sup>+</sup></i>                                                                 | (PBADlrp_S2_F +<br>lacZ-LRP-R)               |
| HL1517 | MG1655 <i>mal::lacI<sup>q</sup></i><br><i>ΔaraBAD araC<sup>+</sup></i><br><i>lacI<sup>q</sup>::P<sub>BAD</sub>-lrp S1-lacZ</i><br><i>trpE<sup>+</sup> ΔgcvB::kan</i>               | HL1503 +<br>P1( <i>ΔgcvB::kan</i> )          |
| HL1518 | MG1655 <i>mal::lacI<sup>q</sup></i><br><i>ΔaraBAD araC<sup>+</sup></i><br><i>lacI<sup>q</sup>::P<sub>BAD</sub>-lrp S2-lacZ</i><br><i>trpE<sup>+</sup> ΔgcvB::kan</i>               | HL1505 +<br>P1( <i>ΔgcvB::kan</i> )          |
| HL1525 | MG1655 <i>mal::lacI<sup>q</sup></i><br><i>ΔaraBAD araC<sup>+</sup></i><br><i>lacI<sup>q</sup>::P<sub>BAD</sub>-lrp mt4-lacZ</i><br><i>ΔgcvB::kan</i>                               | HL1149 +<br>P1( <i>ΔgcvB::kan</i> )          |
| HL1551 | MG1655 <i>mal::lacI<sup>q</sup></i><br><i>ΔaraBAD araC<sup>+</sup></i><br><i>lacI<sup>q</sup>::P<sub>BAD</sub>-lrp mt7-lacZ</i><br><i>trpE<sup>+</sup></i>                         | PM1805 + PCR (lrp<br>mt7)                    |
| HL1562 | MG1655 <i>mal::lacI<sup>q</sup></i><br><i>ΔaraBAD araC<sup>+</sup></i><br><i>lacI<sup>q</sup>::P<sub>BAD</sub>-ilvIH-lacZ</i><br><i>ΔdsrA::zeo</i>                                 | HL1213 +<br>P1( <i>ΔdsrA::zeo</i> )          |
| HL1567 | MG1655 <i>mal::lacI<sup>q</sup></i><br><i>ΔaraBAD araC<sup>+</sup></i><br><i>lacI<sup>q</sup>::P<sub>BAD</sub>-ilvIH-lacZ</i><br><i>ΔgcvB::kan</i>                                 | HL1213 +<br>P1( <i>ΔgcvB::kan</i> )          |
| HL1579 | MG1655 <i>mal::lacI<sup>q</sup></i><br><i>ΔaraBAD araC<sup>+</sup></i><br><i>lacI<sup>q</sup>::P<sub>BAD</sub>-ilvIH-lacZ</i><br><i>Δhfq::cat</i>                                  | HL1213 +<br>P1( <i>Δhfq::cat</i> )           |
| HL1576 | MG1655 <i>mal::lacI<sup>q</sup></i><br><i>ΔaraBAD araC<sup>+</sup></i><br><i>lacI<sup>q</sup>::P<sub>BAD</sub>-ilvIH-lacZ</i><br><i>ΔdsrA::zeo ΔgcvB::kan</i>                      | HL1562 +<br>P1( <i>ΔgcvB::kan</i> )          |
| HL1586 | MG1655 <i>mal::lacI<sup>q</sup></i><br><i>ΔaraBAD araC<sup>+</sup></i><br><i>lacI<sup>q</sup>::P<sub>BAD</sub>-ilvIH-lacZ</i><br><i>ΔdsrA::zeo ΔgcvB::kan</i><br><i>ΔmicF::cat</i> | HL1576 +<br>P1( <i>ΔmicF::cat</i> )          |
| HL1667 | MG1655 <i>mal::lacI<sup>q</sup></i><br><i>ΔaraBAD araC<sup>+</sup></i><br><i>lacI<sup>q</sup>::P<sub>BAD</sub>-marR-lacZ</i><br><i>trpE<sup>+</sup></i>                            | PM1805 + PCR<br>(PBAD-ROB-F +<br>lacZ-ROB-R) |
| HL1693 | MG1655 <i>mal::lacI<sup>q</sup></i>                                                                                                                                                | PM1805 + PCR (lrp                            |



|        |                                                                                                                                                                       |                                                 |
|--------|-----------------------------------------------------------------------------------------------------------------------------------------------------------------------|-------------------------------------------------|
|        | <i>ΔaraBAD araC<sup>+</sup></i><br><i>lacI<sup>q</sup>::P<sub>BAD</sub>-lrp mt8-lacZ</i><br><i>trpE<sup>+</sup></i>                                                   | mt8)                                            |
| HL1694 | MG1655 <i>mal::lacI<sup>q</sup></i><br><i>ΔaraBAD araC<sup>+</sup></i><br><i>lacI<sup>q</sup>::P<sub>BAD</sub>-lrp mt9-lacZ</i><br><i>trpE<sup>+</sup></i>            | PM1805 + PCR (lrp<br>mt9)                       |
| HL1695 | MG1655 <i>mal::lacI<sup>q</sup></i><br><i>ΔaraBAD araC<sup>+</sup></i><br><i>lacI<sup>q</sup>::P<sub>BAD</sub>-lrp S3-lacZ</i><br><i>trpE<sup>+</sup></i>             | PM1805 + PCR<br>(PBADlrp_S3_F +<br>lacZ-LRP-R)  |
| HL1696 | MG1655 <i>mal::lacI<sup>q</sup></i><br><i>ΔaraBAD araC<sup>+</sup></i><br><i>lacI<sup>q</sup>::P<sub>BAD</sub>-lrp S4-lacZ</i><br><i>trpE<sup>+</sup></i>             | PM1805 + PCR<br>(PBADlrp_S4_F +<br>lacZ-LRP-R)  |
| HL1697 | MG1655 <i>mal::lacI<sup>q</sup></i><br><i>ΔaraBAD araC<sup>+</sup></i><br><i>lacI<sup>q</sup>::P<sub>BAD</sub>-lrp S5-lacZ</i><br><i>trpE<sup>+</sup></i>             | PM1805 + PCR<br>(PBADlrp_S5_F +<br>lacZ-LRP-R)  |
| HL1698 | MG1655 <i>mal::lacI<sup>q</sup></i><br><i>ΔaraBAD araC<sup>+</sup></i><br><i>lacI<sup>q</sup>::P<sub>BAD</sub>-soxS_3-lacZ</i><br><i>trpE<sup>+</sup></i>             | PM1805 + PCR<br>(PBAD-SOXS_3F +<br>lacZ-SOXS-R) |
| HL1699 | MG1655 <i>mal::lacI<sup>q</sup></i><br><i>ΔaraBAD araC<sup>+</sup></i><br><i>lacI<sup>q</sup>::P<sub>BAD</sub>-lrp mt8-lacZ</i><br><i>trpE<sup>+</sup> ΔgcvB::kan</i> | HL1693 + P1<br>( <i>ΔgcvB::kan</i> )            |
| HL1700 | MG1655 <i>mal::lacI<sup>q</sup></i><br><i>DaraBAD araC<sup>+</sup></i><br><i>lacI<sup>q</sup>::P<sub>BAD</sub>-lrp mt9-lacZ</i><br><i>trpE<sup>+</sup> ΔgcvB::kan</i> | HL1694 + P1<br>( <i>ΔgcvB::kan</i> )            |
| HL1701 | MG1655 <i>mal::lacI<sup>q</sup></i><br><i>ΔaraBAD araC<sup>+</sup></i><br><i>lacI<sup>q</sup>::P<sub>BAD</sub>-lrp S3-lacZ</i><br><i>trpE<sup>+</sup> ΔgcvB::kan</i>  | HL1695 + P1<br>( <i>ΔgcvB::kan</i> )            |
| HL1702 | MG1655 <i>mal::lacI<sup>q</sup></i><br><i>ΔaraBAD araC<sup>+</sup></i><br><i>lacI<sup>q</sup>::P<sub>BAD</sub>-lrp S4-lacZ</i><br><i>trpE<sup>+</sup> ΔgcvB::kan</i>  | HL1696 + P1<br>( <i>ΔgcvB::kan</i> )            |
| HL1703 | MG1655 <i>mal::lacI<sup>q</sup></i><br><i>ΔaraBAD araC<sup>+</sup></i><br><i>lacI<sup>q</sup>::P<sub>BAD</sub>-lrp S5-lacZ</i><br><i>trpE<sup>+</sup> ΔgcvB::kan</i>  | HL1697 + P1<br>( <i>ΔgcvB::kan</i> )            |
| HL1717 | MG1655 <i>mal::lacI<sup>q</sup></i><br><i>ΔaraBAD araC<sup>+</sup></i>                                                                                                | PM1805 + PCR (lrp<br>mt10)                      |

|        |                                                                                                                                                                                                                                              |                                                                                 |
|--------|----------------------------------------------------------------------------------------------------------------------------------------------------------------------------------------------------------------------------------------------|---------------------------------------------------------------------------------|
|        | <i>lacI</i> ::P <sub>BAD</sub> - <i>lrp mt10-lacZ</i><br><i>trpE</i> <sup>+</sup>                                                                                                                                                            |                                                                                 |
| HL1719 | MG1655 <i>mal</i> :: <i>lacI</i> <sup>q</sup><br>$\Delta$ <i>araBAD araC</i> <sup>+</sup><br><i>lacI</i> ::P <sub>BAD</sub> - <i>lrp mt10-lacZ</i><br><i>trpE</i> <sup>+</sup> $\Delta$ <i>gcvB</i> :: <i>kan</i>                            | HL1717 + P1<br>( $\Delta$ <i>gcvB</i> :: <i>kan</i> )                           |
| HL1731 | MG1655 <i>mal</i> :: <i>lacI</i> <sup>q</sup><br>$\Delta$ <i>araBAD araC</i> <sup>+</sup><br><i>lacI</i> ::P <sub>BAD</sub> - <i>lrp mt11-lacZ</i><br><i>trpE</i> <sup>+</sup>                                                               | PM1805 + PCR ( <i>lrp</i><br><i>mt11</i> )                                      |
| HL1732 | MG1655 <i>mal</i> :: <i>lacI</i> <sup>q</sup><br>$\Delta$ <i>araBAD araC</i> <sup>+</sup><br><i>lacI</i> ::P <sub>BAD</sub> - <i>lrp mt12-lacZ</i><br><i>trpE</i> <sup>+</sup>                                                               | PM1805 + PCR ( <i>lrp</i><br><i>mt12</i> )                                      |
| HL1734 | MG1655 <i>mal</i> :: <i>lacI</i> <sup>q</sup><br>$\Delta$ <i>araBAD araC</i> <sup>+</sup><br><i>lacI</i> ::P <sub>BAD</sub> - <i>lrp mt11-lacZ</i><br><i>trpE</i> <sup>+</sup> $\Delta$ <i>gcvB</i> :: <i>kan</i>                            | HL1731 + P1<br>( $\Delta$ <i>gcvB</i> :: <i>kan</i> )                           |
| HL1735 | MG1655 <i>mal</i> :: <i>lacI</i> <sup>q</sup><br>$\Delta$ <i>araBAD araC</i> <sup>+</sup><br><i>lacI</i> ::P <sub>BAD</sub> - <i>lrp mt12-lacZ</i><br><i>trpE</i> <sup>+</sup> $\Delta$ <i>gcvB</i> :: <i>kan</i>                            | HL1732 + P1<br>( $\Delta$ <i>gcvB</i> :: <i>kan</i> )                           |
| HL1772 | MG1655 <i>mal</i> :: <i>lacI</i> <sup>q</sup><br>$\Delta$ <i>araBAD araC</i> <sup>+</sup><br><i>lacI</i> ::P <sub>BAD</sub> - <i>soxS mt7-lacZ</i> ,<br><i>araE</i> '                                                                        | HL1123 + PCR<br>(P <sub>BAD</sub> -SOX-F +<br><i>lacZ</i> -SOXS- <i>mt7-R</i> ) |
| HL1755 | MG1655 <i>mal</i> :: <i>lacI</i> <sup>q</sup><br>$\Delta$ <i>araBAD araC</i> <sup>+</sup><br><i>lacI</i> ::P <sub>BAD</sub> - <i>soxS-lacZ</i> ,<br>$\Delta$ <i>spf</i> :: <i>cat</i> , <i>araE</i> ',<br>$\Delta$ <i>mgrR</i> :: <i>kan</i> | HL1131 + P1<br>( $\Delta$ <i>mgrR</i> :: <i>kan</i> )                           |
| HL1775 | MG1655 <i>mal</i> :: <i>lacI</i> <sup>q</sup><br>$\Delta$ <i>araBAD araC</i> <sup>+</sup><br><i>lacI</i> ::P <sub>BAD</sub> - <i>soxS mt7-lacZ</i> ,<br><i>araE</i> ', $\Delta$ <i>mgrR</i> :: <i>kan</i>                                    | HL1772 + P1<br>( $\Delta$ <i>mgrR</i> :: <i>kan</i> )                           |
| HL1788 | MG1655 <i>mal</i> :: <i>lacI</i> <sup>q</sup><br>$\Delta$ <i>araBAD araC</i> <sup>+</sup><br><i>lacI</i> ::P <sub>BAD</sub> - <i>soxS mt6-lacZ</i> ,<br><i>araE</i> '                                                                        | HL1123 + PCR<br>(P <sub>BAD</sub> -SOX-F +<br><i>lacZ</i> -SOXS- <i>mt6-R</i> ) |
| HL1790 | MG1655 <i>mal</i> :: <i>lacI</i> <sup>q</sup><br>$\Delta$ <i>araBAD araC</i> <sup>+</sup><br><i>lacI</i> ::P <sub>BAD</sub> - <i>soxS mt6-lacZ</i> ,<br><i>araE</i> ', $\Delta$ <i>spf</i> :: <i>cat</i>                                     | HL1788 + P1<br>( $\Delta$ <i>spf</i> :: <i>cat</i> )                            |
| HL1791 | MG1655 <i>mal</i> :: <i>lacI</i> <sup>q</sup><br>$\Delta$ <i>araBAD araC</i> <sup>+</sup>                                                                                                                                                    | HL1790 + P1<br>( $\Delta$ <i>mgrR</i> :: <i>kan</i> )                           |

|        |                                                                                                                                                                                                                                           |                                                                                    |
|--------|-------------------------------------------------------------------------------------------------------------------------------------------------------------------------------------------------------------------------------------------|------------------------------------------------------------------------------------|
|        | <i>lacI</i> ::P <sub>BAD</sub> - <i>soxS</i> <i>mt6-lacZ</i> ,<br><i>araE</i> ', $\Delta$ <i>spf</i> :: <i>cat</i> ,<br>$\Delta$ <i>mgrR</i> :: <i>kan</i>                                                                                |                                                                                    |
| HL1799 | MG1655 <i>mal</i> :: <i>lacI</i> <sup>q</sup><br>$\Delta$ <i>araBAD</i> <i>araC</i> <sup>+</sup><br><i>lacI</i> ::P <sub>BAD</sub> - <i>lrp</i> <i>mt13-lacZ</i><br><i>trpE</i> <sup>+</sup>                                              | PM1805 + gblock ( <i>lrp</i><br><i>mt13</i> )                                      |
| HL1801 | MG1655 <i>mal</i> :: <i>lacI</i> <sup>q</sup><br>$\Delta$ <i>araBAD</i> <i>araC</i> <sup>+</sup><br><i>lacI</i> ::P <sub>BAD</sub> - <i>lrp</i> <i>mt14-lacZ</i><br><i>trpE</i> <sup>+</sup>                                              | PM1805 + gblock ( <i>lrp</i><br><i>mt14</i> )                                      |
| HL1803 | MG1655 <i>mal</i> :: <i>lacI</i> <sup>q</sup><br>$\Delta$ <i>araBAD</i> <i>araC</i> <sup>+</sup><br><i>lacI</i> ::P <sub>BAD</sub> - <i>lrp</i> <i>mt13-lacZ</i><br><i>trpE</i> <sup>+</sup> $\Delta$ <i>gcvB</i> :: <i>kan</i>           | HL1799 + P1<br>( $\Delta$ <i>gcvB</i> :: <i>kan</i> )                              |
| HL1804 | MG1655 <i>mal</i> :: <i>lacI</i> <sup>q</sup><br>$\Delta$ <i>araBAD</i> <i>araC</i> <sup>+</sup><br><i>lacI</i> ::P <sub>BAD</sub> - <i>lrp</i> <i>mt14-lacZ</i><br><i>trpE</i> <sup>+</sup> $\Delta$ <i>gcvB</i> :: <i>kan</i>           | HL1801 + P1<br>( $\Delta$ <i>gcvB</i> :: <i>kan</i> )                              |
| HL1808 | MG1655 <i>mal</i> :: <i>lacI</i> <sup>q</sup><br>$\Delta$ <i>araBAD</i> <i>araC</i> <sup>+</sup><br><i>lacI</i> ::P <sub>BAD</sub> - <i>lrp</i> <i>mt15-lacZ</i><br><i>trpE</i> <sup>+</sup>                                              | PM1805 + gblock ( <i>lrp</i><br><i>mt15</i> )                                      |
| HL1810 | MG1655 <i>mal</i> :: <i>lacI</i> <sup>q</sup><br>$\Delta$ <i>araBAD</i> <i>araC</i> <sup>+</sup><br><i>lacI</i> ::P <sub>BAD</sub> - <i>lrp</i> <i>mt15-lacZ</i><br><i>trpE</i> <sup>+</sup> $\Delta$ <i>gcvB</i> :: <i>kan</i>           | HL1808 + P1<br>( $\Delta$ <i>gcvB</i> :: <i>kan</i> )                              |
| HL1813 | MG1655 <i>mal</i> :: <i>lacI</i> <sup>q</sup><br>$\Delta$ <i>araBAD</i> <i>araC</i> <sup>+</sup><br><i>lacI</i> ::P <sub>BAD</sub> - <i>lrp</i> <i>S1mt16-</i><br><i>lacZ</i> <i>trpE</i> <sup>+</sup>                                    | PM1805 +<br>PCR( <i>lrp2mt</i> *;<br>PBAD <i>lrp_S1_F</i> +<br><i>lacZ</i> -LRP-R) |
| HL1814 | MG1655 <i>mal</i> :: <i>lacI</i> <sup>q</sup><br>$\Delta$ <i>araBAD</i> <i>araC</i> <sup>+</sup><br><i>lacI</i> ::P <sub>BAD</sub> - <i>lrp</i> <i>S3mt16-</i><br><i>lacZ</i> <i>trpE</i> <sup>+</sup>                                    | PM1805 +<br>PCR( <i>lrp2mt</i> *;<br>PBAD <i>lrp_S3_F</i> +<br><i>lacZ</i> -LRP-R) |
| HL1815 | MG1655 <i>mal</i> :: <i>lacI</i> <sup>q</sup><br>$\Delta$ <i>araBAD</i> <i>araC</i> <sup>+</sup><br><i>lacI</i> ::P <sub>BAD</sub> - <i>lrp</i> <i>S1mt16-</i><br><i>lacZ</i> <i>trpE</i> <sup>+</sup> $\Delta$ <i>gcvB</i> :: <i>kan</i> | HL1813 +<br>P1( $\Delta$ <i>gcvB</i> :: <i>kan</i> )                               |
| HL1816 | MG1655 <i>mal</i> :: <i>lacI</i> <sup>q</sup><br>$\Delta$ <i>araBAD</i> <i>araC</i> <sup>+</sup><br><i>lacI</i> ::P <sub>BAD</sub> - <i>lrp</i> <i>S3mt16-</i><br><i>lacZ</i> <i>trpE</i> <sup>+</sup> $\Delta$ <i>gcvB</i> :: <i>kan</i> | HL1814 +<br>P1( $\Delta$ <i>gcvB</i> :: <i>kan</i> )                               |

**Table S2. Primers and probes used in this study**

| Primer or probe                                   | Sequence (5' to 3')                                                           |
|---------------------------------------------------|-------------------------------------------------------------------------------|
| Construction of <i>lacZ</i> translational fusions |                                                                               |
| PBAD-CRP-F1                                       | ACCTGACGCTTTTTATCGCAACTCTCTACTGTTTCTCCAT<br>GATGCTACAGTAATACATTG              |
| lacZ-CRP-R                                        | GGCCAGGGTTTTCCCAGTCACGACGTTGTAAAACGACG<br>GCGTGGCAATGAGACAAGAACCA             |
| PBAD-FNR-F                                        | ACCTGACGCTTTTTATCGCAACTCTCTACTGTTTCTCCAT<br>ATATCAATTACGGCTTGAGC              |
| lacZ-FNR-R                                        | GGCCAGGGTTTTCCCAGTCACGACGTTGTAAAACGACG<br>GCGCAATGGATAGCACAACCGCC             |
| PBAD-HNS-F                                        | ACCTGACGCTTTTTATCGCAACTCTCTACTGTTTCTCCAT<br>AACAAACCACCCCAATATAA              |
| lacZ-HNS-R                                        | GGCCAGGGTTTTCCCAGTCACGACGTTGTAAAACGACG<br>GCTTCTCTTGCCTGCGCACGAAG             |
| PBAD-LRP-F                                        | ACCTGACGCTTTTTATCGCAACTCTCTACTGTTTCTCCAT<br>GGAAGAAAAAAAAACAGTATT             |
| lacZ-LRP-R                                        | GGCCAGGGTTTTCCCAGTCACGACGTTGTAAAACGACG<br>GCAAGAATGTTACGATCGATACG             |
| PBAD-SOXS-F                                       | ACCTGACGCTTTTTATCGCAACTCTCTACTGTTTCTCCAT<br>AGATGAATTAACGAACTGAA              |
| lacZ-SOXS-R                                       | GGCCAGGGTTTTCCCAGTCACGACGTTGTAAAACGACG<br>GCCTGGTCAATATGCTCGTCAAT             |
| PBAD-ROB-F                                        | ACCTGACGCTTTTTATCGCAACTCTCTACTGTTTCTCCAT<br>ACCTGATGTCAGGTGCTCGT              |
| lacZ-ROB-R                                        | GGCCAGGGTTTTCCCAGTCACGACGTTGTAAAACGACG<br>GCCTGATCCAGATGACCTTCCAG             |
| PBAD-MARRA-F                                      | ACCTGACGCTTTTTATCGCAACTCTCTACTGTTTCTCCAT<br>AACTAATTACTTGCCAGGGCAAC           |
| lacZ-MARRA-R                                      | GGCCAGGGTTTTCCCAGTCACGACGTTGTAAAACGACG<br>GCTTTCTTCTGATTAACCATATGG            |
| PBAD-OMPF-F                                       | ACCTGACGCTTTTTATCGCAACTCTCTACTGTTTCTCCAT<br>AGACACATAAAGACACCAA               |
| lacZ-OMPF-R                                       | GGCCAGGGTTTTCCCAGTCACGACGTTGTAAAACGACG<br>GCTAACAGAGCAGGGACGATCAC             |
| PBADlrp_Sl_F                                      | ACCTGACGCTTTTTATCGCAACTCTCTACTGTTTCTCCAT<br>GGAAGAAAAAAAAATTCGGTCTATCGTGACGGG |
| PBAD-MARR-F                                       | ACCTGACGCTTTTTATCGCAACTCTCTACTGTTTCTCCAT<br>AACTAATTACTTGCCAGGGCAAC           |
| lacZ-MARR-R                                       | GGCCAGGGTTTTCCCAGTCACGACGTTGTAAAACGACG<br>GCTTTCTTCTGATTAACCATATGG            |
| PBAD-ROB-F                                        | ACCTGACGCTTTTTATCGCAACTCTCTACTGTTTCTCCAT<br>ACCTGATGTCAGGTGCTCGT              |
| PBAD-ROB-R                                        | GGCCAGGGTTTTCCCAGTCACGACGTTGTAAAACGACG<br>GCCTGATCCAGATGACCTTCCAG             |

|                      |                                                                                                                                                                                                                                                                                                                                                                                                                        |
|----------------------|------------------------------------------------------------------------------------------------------------------------------------------------------------------------------------------------------------------------------------------------------------------------------------------------------------------------------------------------------------------------------------------------------------------------|
| PBADlrp_S2_F         | ACCTGACGCTTTTTATCGCAACTCTCTACTGTTTCTCCAT<br>GGAAGAAAAAATACAGAGAGACAATAATAATG                                                                                                                                                                                                                                                                                                                                           |
| PBADlrp_S3_F         | ACCTGACGCTTTTTATCGCAACTCTCTACTGTTTCTCCAT<br>GGAAGAAAAAATAGCGACTCTGAACAGTGAT                                                                                                                                                                                                                                                                                                                                            |
| PBADlrp_S4_F         | ACCTGACGCTTTTTATCGCAACTCTCTACTGTTTCTCCAT<br>GGAAGAAAAAATCAGACAGGAGTAGGGAAGG                                                                                                                                                                                                                                                                                                                                            |
| PBADlrp_S5_F         | ACCTGACGCTTTTTATCGCAACTCTCTACTGTTTCTCCAT<br>GGAAGAAAAAACAGGAGTAGGGAAGGAATAC                                                                                                                                                                                                                                                                                                                                            |
| ilvIH -327F          | CGAAGCGGCATGCATTTACGTTGACACCATCGAATGGC<br>GCTCAGTGGATG GAAGAGCAAT TAGTCTCAAT                                                                                                                                                                                                                                                                                                                                           |
| PBAD-SOXS_3-F        | ACCTGACGCTTTTTATCGCAACTCTCTACTGTTTCTCCAT<br>AGATGAATTA AAAAGAGGCAGATTTATGTCCCATCAG                                                                                                                                                                                                                                                                                                                                     |
| lacZ-SOXS_1-R        | GGCCAGGGTTTTCCCAGTCACGACGTTGTAAAACGACG<br>GCATCCTGAATAATTTTCTGAT                                                                                                                                                                                                                                                                                                                                                       |
| lacZ-SOXS-mt6-R      | GGCCAGGGTTTTCCCAGTCACGACGTTGTAAAACGACG<br>GCCTGGTCAATATGCTCGTCAATCCATCGGATAAG                                                                                                                                                                                                                                                                                                                                          |
| lacZ-SOXS-mt7-R      | GGCCAGGGTTTTCCCAGTCACGACGTTGTAAAACGACG<br>GCCTGGTCAATATGCTCGTCAATGGATGCGATAAG                                                                                                                                                                                                                                                                                                                                          |
| ilvIH +33R           | TAACGCCAGGGTTTTCCCAGTCACGACGTTGTAAAACG<br>ACCATAGCTGTTTCTGTGTGAGGCCTGCCTCACTGTTT<br>GACGGAAAAAATG                                                                                                                                                                                                                                                                                                                      |
| Chromosomal mutation |                                                                                                                                                                                                                                                                                                                                                                                                                        |
| Lrp-mt1-F            | GGAATACAGAGAGACAATAATAATGGTACGAGCTAAG<br>AAGCGCCCTGGCAAAGATCTCG                                                                                                                                                                                                                                                                                                                                                        |
| Lrp-mt1-R            | AAGAATGTTACGATCGATACGGTCGAGATCTTTGCCAG<br>GGCGCTTCTTAGCTCGTACCATTATTATTGTCTCTCTGTA<br>TTCC                                                                                                                                                                                                                                                                                                                             |
| Lrp-mt4-F            | CTGAACAGTGATGTTTCAGGGTCACTGTCCACTAGGGA<br>AGGAATACAGAGAGAC                                                                                                                                                                                                                                                                                                                                                             |
| Lrp-mt4-R            | GTCTCTCTGTATTCCTTCCCTAGTGGACAGTGACCCTGA<br>AACATCACTGTTTACG                                                                                                                                                                                                                                                                                                                                                            |
| Lrp-mt5-R            | GGCCAGGGTTTTCCCAGTCACGACGTTGTAAAACGACG<br>GCAAGAATGTTACGATCGATACGGTCGAGATCTTTGCC<br>AGGGCCGTTGTTTCGTATCTAC                                                                                                                                                                                                                                                                                                             |
| Lrp-mt13 (gblock)    | ACCTGACGCTTTTTATCGCAACTCTCTACTGTTTCTCCAT<br>GGAAGAAAAA AAACAGTATTCTTATATGCGCATAACCA<br>TGCATGTAAATACCATGTTTACCGTGCTAGTGAAATCTA<br>CGTATGGCGTGCTGTCACGCCATTTCGTGATGTCGATAGC<br>TGCCACAAGGCAACGGTCTTCTCACCGTAGACCCAGGC<br>ATTGCGCGCCGTGAATCTTCATGATTTCCGGTCTATCGTG<br>ACGGGTAGCGACTCTGAACAGTGATGTTTCAGGGTCAG<br>ACAGGAGTAGGGAAGGAATACAGAGAGACAATAATAA<br>TGGTAGATAGCAAGAAGCGCCCTGGCAAAGATCTCGAC<br>CGTATCGATCGTAACATTCTT |
| Lrp-mt14 (gblock)    | ACCTGACGCTTTTTATCGCAACTCTCTACTGTTTCTCCAT<br>GGAAGAAAAA AAACAGTATTCTTATATGCGCATAACCA                                                                                                                                                                                                                                                                                                                                    |

|                          |                                                                                                                                                                                                                                                                                                                                                                                                                     |
|--------------------------|---------------------------------------------------------------------------------------------------------------------------------------------------------------------------------------------------------------------------------------------------------------------------------------------------------------------------------------------------------------------------------------------------------------------|
|                          | TGCATGTAAATACCATGTTTACCGTGCTAGTGAAATCTA<br>CGTATGGCGTGCTGTCACGCCATTTCGTGATGTCGATAGC<br>TGCCACAAGGCAACGGTCTTCTCACCGTAGACCCAGGC<br>ATTGCGCGCCGTGAATCTTCATGATTCGGTCTATCGTG<br>ACGGGTAGCGACTCTGAACAGTGATGTTTCAGGGTCAC<br>TGTCGAGTAGGGAAGGAATACAGAGAGACAATAATAAT<br>GGTAGATAGCAAGAAGCGCCCTGGCAAAGATCTCGACC<br>GTATCGATCGTAACATTCTT                                                                                       |
| Lrp-mt15 (gblock)        | ACCTGACGCTTTTTATCGCAACTCTCTACTGTTTCTCCAT<br>GGAAGAAAAAAAAACAGTATTCTTATATGCGCATAACCA<br>TGCATGTAAATACCATGTTTACCGTGCTAGTGAAATCTA<br>CGTATGGCGTGGAGTACGCCATTTCGTGATGTCGATAG<br>CTGCCACAAGGCAACGGTCTTCTCACCGTAGACCCAGG<br>CATTGCGCGCCGTGAATCTTCATGATTCGGTCTATCGT<br>GACGGGTAGCGACTCTGAACAGTGATGTTTCAGGGTCA<br>GAGTCGAGTAGGGAAGGAATACAGAGAGACAATAATA<br>ATGGTAGATAGCAAGAAGCGCCCTGGCAAAGATCTCGA<br>CCGTATCGATCGTAACATTCTT |
| Construction of plasmids |                                                                                                                                                                                                                                                                                                                                                                                                                     |
| micF_mt1_F               | CAAGATACTGACGTCAGCTCGATCATTAACTTTATTTAT<br>TACC                                                                                                                                                                                                                                                                                                                                                                     |
| micF_mt1_R               | GGTAATAAATAAAGTTAATGATCGAGCTGACGTCAGTA<br>TCTTG                                                                                                                                                                                                                                                                                                                                                                     |
| micF_mt2_F               | GACGTCGCTATCATCATTAAAGCGCATTTATTACCGTCAT<br>TC                                                                                                                                                                                                                                                                                                                                                                      |
| micF_mt2_R               | GAATGACGGTAATAAATGCGCTTAATGATGATAGCGAC<br>GTC                                                                                                                                                                                                                                                                                                                                                                       |
| micF_mt3_F               | CGTCGCTATCATCATTAACTTTATTCTCCAGGGTCATTC<br>ATTTCTGAATGTC                                                                                                                                                                                                                                                                                                                                                            |
| micF_mt3_R               | GACATTCAGAAATGAATGACCCTGGAGAATAAAGTTAA<br>TGATGATAGCGACG                                                                                                                                                                                                                                                                                                                                                            |
| dsrA_mt1_F               | GGTGTAACGAATTTTTTAAGTCGTTGTTTCGTTAAGCAAG<br>TTTCATCCCGACCC                                                                                                                                                                                                                                                                                                                                                          |
| dsrA_mt1_R               | GGGTCGGGATGAAACTTGCTTAACGAACAACGACTTAA<br>AAAATTCGTTACACC                                                                                                                                                                                                                                                                                                                                                           |
| gcvB_mt1_F               | CGTGTTCTGGTGAACTTTTGGCTTAGAATTGTGATGTTG<br>TGTTGTTGTG                                                                                                                                                                                                                                                                                                                                                               |
| gcvB_mt1_R               | CACAACAACACAACATCACAATTCTAAGCCAAAAGTTC<br>ACCAGAACACG                                                                                                                                                                                                                                                                                                                                                               |
| gcvB_mt2_F               | TCTGGTGAACTTTTGGCTTACGGTTATAATGTTGTGTTG<br>TTGTGTTTGC                                                                                                                                                                                                                                                                                                                                                               |
| gcvB_mt2_R               | GCAAACAACAACAACATTATAACCGTAAGCCAAA<br>AGTTCACCAGA                                                                                                                                                                                                                                                                                                                                                                   |
| gcvB_mt3_F               | CTTTTGGCTTACGGTTGTGACGCTGTGTTGTTGTGTTTGC<br>ACCC                                                                                                                                                                                                                                                                                                                                                                    |
| gcvB_mt3_R               | GGGTGCAAACAACAACAACACAGCGTCACAACCGTAAGC                                                                                                                                                                                                                                                                                                                                                                             |

|                        |                                                                                                                                         |
|------------------------|-----------------------------------------------------------------------------------------------------------------------------------------|
|                        | CAAAAG                                                                                                                                  |
| gcvB_mt4_F             | CTTTTTTCACTTCTGTACATTTAGGGACAGTGTCCATA<br>GTGATTAATGTAGCAC                                                                              |
| gcvB_mt4_R             | GTGCTACATTAATCACTATGGACACTGTCCCTAAATGTA<br>CAGGAAGTGAAAAAAG                                                                             |
| gcvB_mt6_F             | CTTTTTTCACTTCTGTACATTTACCGACAGTGTCCATAG<br>TGATTAATGTAGCAC                                                                              |
| gcvB_mt6_R             | GTGCTACATTAATCACTATGGACACTGTCCGGTAAATGTA<br>CAGGAAGTGAAAAAAG                                                                            |
| gcvB_mt7_F             | CTTTTTTCACTTCTGTACATTTGGGACTCTGTCCATAG<br>TGATTAATGTAGCAC                                                                               |
| gcvB_mt7_R             | GTGCTACATTAATCACTATGGACAGAGTCCCAAATGT<br>ACAGGAAGTGAAAAAAG                                                                              |
| gcvB_mt8_F             | CTTTTTTCACTTCTGTACATTTACCGACTCTGTCCATAG<br>TGATTAATGTAGCAC                                                                              |
| gcvB_mt8_R             | GTGCTACATTAATCACTATGGACAGAGTCCGGTAAATGT<br>ACAGGAAGTGAAAAAAG                                                                            |
| In vitro transcription |                                                                                                                                         |
| Lrp iv -267F           | ACG CAC GCT GTA ATA CGA CTC ACT ATA GG<br>GGAAGAAAAA AAACAGTATT                                                                         |
| lrp iv -69F            | ACG CAC GCT GTA ATA CGA CTC ACT ATA GG TA<br>GCGACTCTGA ACAGTGAT                                                                        |
| lrp iv +60R            | AAGAATGTTACGATCGATACG                                                                                                                   |
| GcvB-VTF               | ACG CAC GCT GTA ATA CGA CTC ACT ATA GG<br>ACTTCTGAG CCGGAACGAA                                                                          |
| GcvB-VTR               | AAA AAA AGC ACC GCA ATT AGG CGG TGC TAC ATT<br>AAT CAC TAT GGA CAG ACA GG                                                               |
| GcvBmt6-VTR            | AAAAAAAGCACCGCAATTAGGCGGTGCTACATTAATCA<br>CTATGGACACTGTCG                                                                               |
| GcvBmt8-VTR            | AAAAAAAGCACCGCAATTAGGCGGTGCTACATTAATCA<br>CTATGGACAGAGTCGG                                                                              |
| VT_T7DsrAF             | ACGCACGCTGTAATACGACTCACTATAGGAACACATCA<br>GATTTCTGGTGTAACGAATTTTTAAGTGCTTCTTGCTT<br>AAGCAAGTTTCATCCCGACCCCTCAGGGTTCGGGATTT              |
| GC-VT_T7DsrAR          | AAATCCCGACCCTGAGGGGGTTCGGGATGAAACTTGCTT<br>AAGCAAGAAGCACTTAAAAAATTCGTTACACCAGGAAA<br>TCTGATGTGTTCCATAGTGAGTCGTATTACAGCGTGCG<br>T        |
| VT_MicFF               | ACGCACGCTGTAATACGACTCACTATAGGGCTATCATC<br>ATTAACCTTTATTTATTACCGTCATTCATTTCTGAATGTCT<br>GTTTACCCTATTTCAACCGGATGCCTCGCATTTCGGTTT<br>TTTTT |
| GC-VT_MicFR            | AAAAAAAACCGAATGCGAGGCATCCGGTTGAAATAGG<br>GGTAAACAGACATTCAGAAATGAATGACGGTAATAAAT<br>AAAGTTAATGATGATAGCCCTATAGTGAGTCGTATTAC<br>AGCGTGCGT  |

| Construction of SPA tag               |                                                                   |
|---------------------------------------|-------------------------------------------------------------------|
| Lrp_SPA_F                             | AGAAGTCAAGCAGAGTAATCGTCTGGTTATTAAGACGC<br>GCTCCATGGAAAAGAGAAG     |
| Lrp_SPA_R                             | GAGTGTAATCAAAATACGCCGATTTTGCACCTGTTCCGT<br>G CATATGAATATCCTCCTTAG |
| Biotinylated probes for Northern blot |                                                                   |
| Lrp probe                             | ATTCAGAGTAATCTCAACGAATACCAGAAGTGATGC                              |
| MicF probe                            | TCCGGTTGAAATAGGGGTAAACAGACATTCAGAAA                               |
| Spot 42 probe                         | GAAGTAAAAGGTCTGAAAGATAGAACATCTTACCTC                              |
| GcvB probe                            | CCAGAACACGCATTCCGATAAAACTTTTCGTTCCGGCTCA                          |
| MgrR probe                            | CAGTAAACCGGCGGTGAATGCTTGCATGGATAG                                 |
| SoxS probe                            | GGAACATTCGTTGCAAGTACCACTTTGAATAGCCTG                              |
| SsrA probe                            | CGCCACTAACAAACTAGCCTGATTAAGTTTTAACGCTTCA                          |



**Table S3. Regulation of mutant and wild-type *lrp* fusions with sRNAs.**

|                         | Strain name | plac                    | pGcvB               | pGcvB_mt4                | pMicF                                       | pMicF_mt1              | pDsrA                                       | pDsrA_mt1            |
|-------------------------|-------------|-------------------------|---------------------|--------------------------|---------------------------------------------|------------------------|---------------------------------------------|----------------------|
| Lrp::lacZ               | HL1044      | 1,394<br>(14)<br>100%   | 357<br>(10)<br>26%  | 1,002.6<br>(12.2)<br>72% | 190<br>(3.6)<br>14%                         | 865.3<br>(74.6)<br>62% | 637<br>(36)<br>46%                          | 905.5<br>(95)<br>65% |
| Lrp (MicF)<br>mt1::lacZ | HL1079      | 1,006<br>(30.6)<br>100% | 350<br>(86)<br>35%  | ND                       | 859<br>(180)<br>85%                         | 198.3<br>(32.7)<br>20% | <b>744.3</b><br><b>(18.4)</b><br><b>74%</b> | ND                   |
| Lrp (GcvB)<br>mt4::lacZ | HL1149      | 187<br>(8.3)<br>100%    | 103<br>(0)<br>55%   | 168.4<br>(3.3)<br>90%    | ND                                          | ND                     | ND                                          | ND                   |
| Lrp (DsrA)<br>mt5::lacZ | HL1150      | 964<br>(53)<br>100%     | 284<br>(2.6)<br>29% | ND                       | <b>993.5</b><br><b>(6.1)</b><br><b>100%</b> | ND                     | 495<br>(18)<br>51%                          | 355<br>(30)<br>37%   |

Results are the average value of three independent experiments. Errors are the numbers in parentheses. ND: Not done. Level of expression of plac vector control was set to 100%, and expression levels in the presence of an sRNA are compared to this value for each row. Numbers in bold demonstrate effect of *lrp* mutations that lose regulation by MicF on the ability of DsrA to repress and vice versa.

**Table S4. Mutational tests of GcvB regulation of *lrp***

|           | Strain name & condition     | plac           | pGcvB        | pGcvB_mt4      | pGcvB_mt6      | pGcvB_mt7    | pGcvB_mt8     |
|-----------|-----------------------------|----------------|--------------|----------------|----------------|--------------|---------------|
| lrp wt    | HL1071<br>( $\Delta gcvB$ ) | 997<br>(100%)  | 286<br>(29%) | 1003<br>(101%) |                |              |               |
| lrp wt    | HL1071<br>( $\Delta gcvB$ ) | 1049<br>(100%) | 310<br>(30%) | 981<br>(94%)   | 994<br>(95%)   | 915<br>(87%) | 568<br>(48%)* |
| lrp mt1   | HL1079                      | 1006<br>(100%) | 350<br>(35%) |                |                |              |               |
| lrp mt4   | HL1149                      | 187<br>(100%)  | 102<br>(55%) | 168<br>(90%)   |                |              |               |
| lrp mt4   | 10 uM IPTG                  | 190<br>(100%)  | 90<br>(48%)  | 160<br>(84%)   |                |              |               |
| lrp mt5   | HL1150                      | 964<br>(100%)  | 284<br>(29%) |                |                |              |               |
| lrp mt8   | HL1699<br>( $\Delta gcvB$ ) | 1633<br>(100%) | 692<br>(42%) |                | 1517<br>(93%)  |              |               |
| lrp mt8   | 10 uM IPTG                  | 1602<br>(100%) | 757<br>(47%) |                | 1785<br>(111%) |              |               |
| lrp mt9   | HL1700<br>( $\Delta gcvB$ ) | 142<br>(100%)  | 74<br>(52%)  |                | 120<br>(84%)   |              |               |
| lrp mt10  | HL1719<br>( $\Delta gcvB$ ) | 247<br>(100%)  | 127<br>(51%) | 267<br>(108%)  |                |              |               |
| lrp mt11  | HL1734<br>( $\Delta gcvB$ ) | 1046<br>(100%) | 185<br>(18%) |                |                |              |               |
| lrp mt12  | HL1735<br>( $\Delta gcvB$ ) | 128<br>(100%)  | 61<br>(48%)  |                |                | 116<br>(90%) |               |
| lrp mt15* | HL1810<br>( $\Delta gcvB$ ) | 906<br>(100%)  | 711<br>(78%) |                |                |              | 517<br>(57%)  |

$\beta$ -galactosidase activity assay with wild-type, mutant, and truncated *lrp* fusions with wild-type and mutant forms of GcvB multicopy sRNAs. Percentages for each fusion with the plac vector control were set to 100%. The chromosomal *gcvB* allele is deleted in many of these strains (shown under strain name). IPTG was used at 100 uM unless otherwise noted. Mutant locations in the *lrp* leader are shown in Fig. S3; strains are listed in Table S1. Many of these assays were carried out to try to identify direct pairing by using mutations in possible pairing regions and compensating mutations. However, in general, compensating mutations did not work well, suggesting that secondary or tertiary structure in the *lrp* leader may be an important factor for proper regulation. \* These assays were done separately from others, and the value for pGcvB/*lrp*<sup>+</sup> is normalized to the control for that group of experiments (see Fig. 4).

**Table S5. Activity of *lrp* translational fusions and *ilvIH* transcriptional fusions in various genetic backgrounds with MOPS glycerol minimal media.**

|                    |               |               |               |               |                           |               |              |
|--------------------|---------------|---------------|---------------|---------------|---------------------------|---------------|--------------|
|                    | wt            | $\Delta dsrA$ | $\Delta micF$ | $\Delta gcvB$ | $\Delta dsrA, micF, gcvB$ | $\Delta hfg$  | $\Delta lrp$ |
| Strain name        | HL1044        | HL1108        | HL1078        | HL1071        | HL1100                    | HL1189        |              |
| <i>lrp::lacZ</i>   | 2216<br>(160) | 2296<br>(87)  | 2326<br>(147) | 1951<br>(101) | 2222<br>(35)              | 3417<br>(167) |              |
| Strain name        | HL1213        | HL1562        | HL1232        | HL1567        | HL1586                    | HL1579        | HL1231       |
| <i>ilvIH::lacZ</i> | 211<br>(5.5)  | 218<br>(2.4)  | 227<br>(2.4)  | 207<br>(7.5)  | 214<br>(12.4)             | 176<br>(2.9)  | 26<br>(4.0)  |

Cells were grown in MOPS minimal glycerol media; samples were collected at OD<sub>600</sub> 0.5. Errors are the numbers in parentheses.

**References**

1. Sharma, C.M., Papenfort, K., Pernitzsch, S.R., Mollenkopf, H.-J., Hinton, J.C.D. and Vogel, J. (2011) Pervasive post-transcriptional control of genes involved in amino acid metabolism by the Hfq-dependent GcvB small RNA. *Molec. Microbiol.*, **81**, 1144-1165.
2. Modi, S.R., Camacho, D.M., Kohanski, M.A., Walker, G.C. and Collins, J.J. (2011) Functional characterization of bacterial sRNAs using a network biology approach. *Proc Natl Acad Sci U S A*, **108**, 15522-15527.
3. Coornaert, A., Chiaruttini, C., Springer, M. and Guillier, M. (2013) Post-transcriptional control of the Escherichia coli PhoQ-PhoP two-component system by multiple sRNAs involves a novel pairing region of GcvB. *PLoS genetics*, **9**, e1003156.
4. Mandin, P. and Gottesman, S. (2009) A genetic approach for finding small RNAs regulators of genes of interest identifies RybC as regulating the DpiA/DpiB two-component system. *Mol Microbiol*, **72**, 551-565.
5. Moon, K. and Gottesman, S. (2011) Competition among Hfq-binding small RNAs in *Escherichia coli*. *Molecular microbiology*, **82**, 1545-1562.
6. Khlebnikov, A., Datsenko, K.A., Skaug, T., Wanner, B.L. and Keasling, J.D. (2001) Homogeneous expression of the P(BAD) promoter in *Escherichia coli* by constitutive expression of the low-affinity high-capacity AraE transporter. *Microbiology*, **147**, 3241-3247.
7. Bougdour, A., Cuning, C., Baptiste, P.J., Elliott, T. and Gottesman, S. (2008) Multiple pathways for regulation of sigmaS (RpoS) stability in *Escherichia coli* via the action of multiple anti-adaptors. *Molecular microbiology*, **68**, 298-313.
